28 **ABSTRACT**

29 **Background:**

30 The long term and complex nature of Chagas disease in humans has restricted studies on  
31 vaccine feasibility. Animal models also have limitations due to technical difficulties in  
32 monitoring the extremely low parasite burden that is characteristic of chronic stage infections.  
33 Advances in imaging technology offer alternative approaches that circumvent these problems.  
34 Here, we describe the use of highly sensitive whole body *in vivo* imaging to assess the efficacy  
35 of recombinant viral vector vaccines and benznidazole-cured infections to protect mice from  
36 challenge with *Trypanosoma cruzi*.

37

38 **Methodology/Principal Findings:**

39 Mice were infected with *T. cruzi* strains modified to express a red-shifted luciferase reporter.  
40 Using bioluminescence imaging, we assessed the degree of immunity to re-infection conferred  
41 after benznidazole-cure. Mice infected for 14 days or more, prior to the initiation of treatment,  
42 were highly protected from challenge with both homologous and heterologous strains (>99%  
43 reduction in parasite burden). Sterile protection against homologous challenge was frequently  
44 observed. This level of protection was considerably greater than that achieved with  
45 recombinant vaccines. It was also independent of the route of infection or size of the challenge  
46 inoculum, and was long-lasting, with no significant diminution in immunity after almost a year.  
47 When the primary infection was benznidazole-treated after 4 days (before completion of the  
48 first cycle of intracellular infection), the degree of protection was much reduced, an outcome  
49 associated with a minimal *T. cruzi*-specific IFN- $\gamma$ <sup>+</sup> T cell response.

50

51 **Conclusions/Significance:**

52 Our findings suggest that a protective Chagas disease vaccine must have the ability to  
53 eliminate parasites before they reach organs/tissues, such as the GI tract, where once  
54 established, they become largely refractory to the induced immune response.

55

56 **AUTHOR SUMMARY**

57 Chagas disease, which is caused by the protozoan parasite *Trypanosoma cruzi*, is a major  
58 public health problem throughout Latin America. Attempts to develop a vaccine have been  
59 hampered by technical difficulties in monitoring the extremely low parasite burden during the  
60 life-long chronic stage of infection. To circumvent these issues, we used highly sensitive  
61 bioluminescence imaging to assess the ability of recombinant viral vector vaccines and drug-  
62 cured infections to confer protection against experimental challenge in mice. We observed  
63 that drug-cured infections were much more effective than subunit vaccines, with many  
64 instances of sterile protection. Efficacy was independent of the route of infection or size of the  
65 challenge inoculum, and was undiminished after almost a year. In addition, drug-cured  
66 infections conferred a high level of cross-strain protection. The highly sensitive imaging  
67 procedures enabled us to visualise parasite distribution in mice where sterile protection was  
68 not achieved. This suggested that to confer sterile protection, vaccines must prevent the  
69 infection of organs/tissues that act as parasite reservoirs during the chronic stage. Once  
70 established at these sites, parasites become largely refractory to vaccine-induced elimination.

71

72

73

74

75

76

77

78

79

80

81

82

83

## 84 INTRODUCTION

85 Chagas disease is caused by the insect-transmitted protozoan *Trypanosoma cruzi* and is the  
86 most serious parasitic infection in the Americas. More than 5 million people are infected with  
87 this obligate intracellular parasite (1, 2), resulting in a financial burden estimated at \$7 billion  
88 annually (3). In humans, the disease is characterised by an acute stage that occurs 2-8 weeks  
89 post-infection, during which bloodstream parasites are often detectable. Symptoms during this  
90 period are normally mild, although lethal outcomes can occur in 5% of diagnosed cases. The  
91 parasite numbers are then controlled by a vigorous adaptive immune response. However,  
92 sterile immunity is not achieved and infected individuals transition to a chronic stage, which in  
93 most cases, appears to be life-long (4). Around 30-40% of those infected eventually develop  
94 chronic disease pathology, a process that can take decades to become symptomatic.  
95 Cardiomyopathy is the most common clinical manifestation (5, 6), although 10-15% of people  
96 can develop digestive tract megasyndromes, sometimes in addition to cardiac disease.

97

98 Attempts to control Chagas disease have been challenging. For example, although public  
99 health measures have been successful in reducing disease transmission in several regions of  
100 South America, there is a vast zoonotic reservoir that complicates disease eradication by this  
101 route (7-9). The only drugs currently available to treat the infection, the nitroheterocycles  
102 benznidazole and nifurtimox, have limited efficacy and cause toxic side effects that can impact  
103 on patient compliance (10, 11). There have been no new treatments for almost 50 years, but  
104 progress in discovering new chemotherapeutic agents is now being accelerated by a range of  
105 drug development consortia encompassing both the academic and commercial sectors (12).  
106 For many years, vaccine development against Chagas disease has been inhibited by  
107 concerns that autoimmunity could play a role in disease pathogenesis (13, 14). Although not  
108 excluded as a contributory factor, the current consensus is that the risk has been overstated,  
109 and that the continued presence of the parasite is required to drive disease pathology (15-17).

110

111 The host response to *T. cruzi* infection involves a complex combination of both innate and  
112 adaptive immune mechanisms (18, 19). The innate system is key to controlling parasite  
113 proliferation and dissemination during the initial stages of infection (20), with important roles  
114 for both Toll-like receptor (TLR)-mediated inflammatory responses and TLR-independent  
115 processes (21). As the acute phase progresses, the development of an antigen-specific  
116 immune response, in which CD8<sup>+</sup> IFN- $\gamma$ <sup>+</sup> T cells are the key effectors (18, 22), is the critical  
117 step in controlling the infection. In both humans and mice, the major targets of this cellular  
118 response are a small set of immunodominant epitopes within specific members of the trans-  
119 sialidase super-family of surface antigens (23). The observation that the pattern of this  
120 recognition displays strain variation has been interpreted as indicative that immune evasion  
121 could be operating at a population level. The adaptive response reduces the parasite burden  
122 by >99%, with the infection becoming highly focal, and in BALB/c mice at least, confined  
123 predominantly to the large intestine, stomach, and to a lesser extent, the gut mesentery tissue  
124 and sites in the skin (24, 25). The reason why the immune system is not able to eradicate the  
125 infection is unresolved. It does not appear to involve exhaustion of the CD8<sup>+</sup> IFN- $\gamma$ <sup>+</sup> T cell  
126 response, which continues to suppress, but not eliminate, the parasite burden throughout the  
127 long chronic stage (26). These findings have questioned the feasibility of developing an  
128 effective anti-*T. cruzi* vaccine.

129

130 Experimental vaccination of animal models against *T. cruzi* infection has a long history (27),  
131 although there have been few instances in which unequivocal sterile protection has been  
132 reported. Approaches have included the use of attenuated parasites (28, 29), immunisation  
133 with cell fractions (30), purified or recombinant proteins (31, 32) and the use of DNA vaccines.  
134 In the latter case, viral backbones based on vaccinia (33), yellow fever (34) and adenovirus  
135 (35) have been used to facilitate expression of a range of parasite antigens such as trans-  
136 sialidase, Tc24, and the amastigote surface protein-2 (ASP-2) (also a member of the trans-  
137 sialidase super-family). Reported outcomes include protection from lethal infection, reduction

138 in the acute stage parasite burden, induction of a favourable cytokine profile, and reduction in  
139 disease pathology. However, detailed analysis of vaccine efficacy has been limited by an  
140 inability to accurately monitor parasite levels during the chronic stage and technical difficulties  
141 in assessing the effect of the immune response on tissue distribution following challenge  
142 infections.

143

144 Recently, *in vivo* imaging approaches have been exploited to provide new insights into  
145 infection dynamics during experimental chronic Chagas disease (24, 25, 36). These studies  
146 have revealed the pantropic nature of acute stage infections, and shown that during the  
147 chronic stage, the adaptive immune response restricts parasites to small infection foci,  
148 predominantly within the GI tract. Other tissues and organs, including the heart and skeletal  
149 muscle, are infected sporadically, the extent of which is influenced by host:parasite genetics  
150 and immune status. Additional factors such as nutrition, environmental stimuli, age and co-  
151 infections could also play a role in this complex chronic infection profile (37). The survival of  
152 the small parasite foci within apparently tolerant sites is crucial for long-term infection, although  
153 the immunological context of these reservoirs is unknown. Another contributor to the long-term  
154 nature of *T. cruzi* infections could be the phenomenon of parasite dormancy; individual  
155 intracellular amastigotes can enter an apparently quiescent state in which they cease to  
156 replicate and exhibit reduced drug sensitivity (38). Neither the mechanisms involved, nor the  
157 potential implications for immune evasion have yet been established.

158

159 Highly sensitive bioluminescence imaging involves the use of *T. cruzi* strains that have been  
160 modified to express a red-shifted luciferase reporter (39). The system allows the real-time  
161 monitoring of parasite burden in experimental mice during chronic stage infections. There is a  
162 robust correlation between parasite numbers and whole animal bioluminescence, with a limit  
163 of detection close to 100 parasites (24). Here, we describe the use of this imaging technology  
164 to assess the extent of protection in benznidazole-cured mice following re-challenge with

165 homologous and heterologous strains. Our findings have important implications for vaccine  
166 strategies.

167

168

169

170

171

172

173

174

175

176

177

178

179

180

181

182

183

184

185

186

187

188

189

190

191

192

## 193 **MATERIALS AND METHODS**

### 194 **Generation of recombinant ASP-2/TS vaccines**

195 The fusion gene encoding the ASP-2 and TS peptides (Figure 1A) was generated by linking  
196 sequences corresponding to the mouse Ig kappa chain signal peptide, ASP-2 amino acids 1-  
197 694 (GenBank accession no. U77951) and TS amino acids 1-624 (GenBank accession no.  
198 L38457). The furin 2A splice site linker was inserted between the trypanosome sequences to  
199 ensure the subsequent generation of two separate peptides from a single open reading frame  
200 (40). The *ASP-2/TS* fusion gene was cloned into the ChAdOx1 (41) and MVA (42, 43) viral-  
201 vectored vaccine platforms, and confirmed by sequencing prior to use in protection studies.

202

### 203 **Assessment of recombinant vaccine immunogenicity**

204 Vaccines were prepared in PBS and administered intramuscularly into the left and right  
205 quadriceps muscles of mice. The ChAdOx1 vaccine was administered at  $1 \times 10^8$  infectious units  
206 per dose. With MVA:ASP-2/TS, each dose was equivalent to  $1 \times 10^6$  plaque forming units.  
207 ELISpots were carried out using either peripheral blood mononuclear cells (PBMCs) or  
208 splenocytes. Briefly, MAIP ELISpot plates (Millipore) were coated at 4°C overnight with anti-  
209 mouse IFN- $\gamma$  mAb AN-18 (Mabtech), at 250 ng per well, and then blocked for 1 h with complete  
210 DMEM medium (10% foetal calf serum). Whole blood was sampled by venesection of the tail  
211 vein and PBMCs were isolated using histopaque 1083 (Sigma), and plated at  $5 \times 10^5$  cells per  
212 well with 20-mer specific peptides overlapping by 10 amino acids ( $10 \mu\text{g ml}^{-1}$ ) (Pepscan  
213 Presto). Splenocytes from naïve mice were plated  $2.5 \times 10^5$  per well. After 16 h incubation, cells  
214 were discarded and plates washed with PBS. 50  $\mu\text{l}$  of biotinylated anti-mouse IFN- $\gamma$  mAb RA-  
215 6A2 (1:1000 in PBS) was then added to each well and incubated for 2 h. After another washing  
216 step, streptavidin peroxidase (Sigma) was added and incubated at 37°C for 1 h. The plates  
217 were washed and developed with TMB substrate solution (Mabtech). When spots were visible,  
218 the reaction was stopped by washing the plate with water. Spots were analysed using an  
219 ELISpot reader, and the number of spot-forming cells/ $10^6$  PBMCs producing IFN- $\gamma$  was  
220 calculated.



221

## 222 **Murine infections and bioluminescence imaging**

223 Animal work was performed under UK Home Office project licence (PPL 70/8207) and  
224 approved by the LSHTM Animal Welfare and Ethical Review Board. Procedures were in  
225 accordance with the UK Animals (Scientific Procedures) Act 1986 (ASPA). BALB/c mice were  
226 purchased from Charles River (UK), and CB17 SCID mice were bred in-house. Animals were  
227 maintained under specific pathogen-free conditions in individually ventilated cages. They  
228 experienced a 12 h light/dark cycle, with access to food and water *ad libitum*. SCID mice were  
229 infected with  $1 \times 10^4$  bioluminescent bloodstream trypanomastigotes (BTs) in 0.2 ml PBS via  
230 intraperitoneal (i.p.) injection (24, 25, 36). BALB/c female mice, aged 8-10 weeks, were  
231 infected i.p with  $1 \times 10^3$  BTs derived from SCID mouse blood. At experimental end-points, mice  
232 were sacrificed by exsanguination under terminal anaesthesia.

233

234 For *in vivo* imaging, mice were injected with  $150 \text{ mg kg}^{-1}$  d-luciferin i.p., then anaesthetized  
235 using 2.5% (v/v) gaseous isoflurane. They were placed in an IVIS Lumina II system (Caliper  
236 Life Science) 5-10 min after d-luciferin administration and images acquired using LivingImage  
237 4.3. Exposure times varied from 30 s to 5 min, depending on signal intensity. After imaging,  
238 mice were revived and returned to cages. For *ex vivo* imaging, mice were injected with d-  
239 luciferin, and sacrificed by exsanguination under terminal anaesthesia 5 min later. They were  
240 then perfused via the heart with 10 ml  $0.3 \text{ mg ml}^{-1}$  d-luciferin in PBS. Organs and tissues were  
241 removed and transferred to a Petri dish in a standardized arrangement, soaked in  $0.3 \text{ mg ml}^{-1}$   
242 d-luciferin in PBS, and imaged using maximum detection settings (5 min exposure, large  
243 binning). The remaining animal parts and carcass were checked for residual bioluminescent  
244 foci, also using maximum detection settings (24, 25). To estimate parasite burden in live mice,  
245 regions of interest were drawn using LivingImage v.4.3 to quantify bioluminescence as total  
246 flux (photons/second), summed from dorsal and ventral images. The detection threshold for  
247 *in vivo* imaging was determined using uninfected mice.

248

249 **Drug treatment and immunosuppression**

250 Benznidazole was synthesized by Epichem Pty Ltd., Australia, and prepared at 10 mg ml<sup>-1</sup> in  
251 an aqueous suspension vehicle containing 5% (v/v) DMSO, 0.5% (w/v) hydroxypropyl  
252 methylcellulose, 0.5% (v/v) benzyl alcohol and 0.4% (v/v) Tween 80. It was administered by  
253 oral gavage. To detect any residual infection following treatment, mice were  
254 immunosuppressed with cyclophosphamide monohydrate (Sigma) in D-PBS (200 mg kg<sup>-1</sup>),  
255 administered by i.p. injection every 4 days, for 3 doses. Two weeks after the end of  
256 immunosuppression, mice that were bioluminescence negative by both *in vivo* and *ex vivo*  
257 imaging were designated as cured.

258

259

260

261

262

263

264

265

266

267

268

269

270

271

272

273

274

275

276

277 **RESULTS**

278 ***Monitoring ASP-2/TS vaccine efficacy using highly sensitive bioluminescence imaging***

279 The *T. cruzi* amastigote surface protein 2 (ASP-2) and trypomastigote cell surface protein  
280 trans-sialidase (TS) have shown promise as vaccine candidates against *T. cruzi* infections  
281 (44-46). To further assess their efficacy, we used two replication-deficient recombinant  
282 vaccine platforms, a chimpanzee adenovirus (ChAdOx1) and a Modified Vaccinia Ankara virus  
283 (MVA), expressing ASP-2 and TS peptides from a single open reading frame (Fig 1A)  
284 (Materials and Methods) (40). We used a homologous prime-boost vaccination strategy in  
285 which BALB/c mice received intramuscular injections administered one week apart (Fig 1B)  
286 and confirmed immunogenicity of the vaccine delivery system using an *ex vivo* IFN- $\gamma$ <sup>+</sup> ELISpot.  
287 Three weeks after receiving either a prime only, or a prime-booster vaccination, splenocytes  
288 were plated on antibody coated ELISpot plates. When these cells were then stimulated with a  
289 peptide pool representing the entire ASP-2/TS sequence, there was a pronounced increase  
290 in the number of peptide specific IFN- $\gamma$ <sup>+</sup> splenocytes, particularly in those mice that had  
291 received the booster (Fig 1C).

292

293 **Fig 1. Immunogenicity of the recombinant ASP-2/TS vaccine.** (A) Open reading frame  
294 encoding ASP-2 and TS peptides, with the mouse Ig kappa chain signal peptide and furin 2A  
295 splice site linker indicated. (B) Prime-boost vaccination strategy. BALB/c mice (n=5, per  
296 vaccinated group) were inoculated one week apart with ChAdOx1 (priming) and then MVA  
297 (boosting) recombinant vaccines containing the *ASP-2/TS* fusion gene. Control mice received  
298 vaccinations with the same viral vectors engineered to express dengue protein NS-1 (n=3).  
299 (C) ELISpot analysis. Splenocytes were plated onto antibody coated ELISpot plates and  
300 stimulated for 16 h with a peptide pool covering the entire ASP-2 and TS sequences (Materials  
301 and Methods). Data are presented as *ex vivo* IFN- $\gamma$  spot forming cells (SFCs) per 10<sup>6</sup>  
302 splenocytes.

303

304 To test protective efficacy, mice were vaccinated using the homologous prime-boost strategy  
305 outlined above. Three weeks after the MVA booster, they were challenged by i.p. injection with  
306 10<sup>3</sup> bioluminescent *T. cruzi* blood trypomastigotes (strain CL Brener) (Fig 2A). The resulting

307 infection was monitored by *in vivo* imaging (36) (Materials and Methods). In BALB/c mice,  
308 parasites rapidly disseminate and proliferate, with the infection reaching a peak after  
309 approximately 2 weeks. Thereafter, a vigorous adaptive immune response reduces the  
310 parasite burden by >2 orders of magnitude, and the infection transitions to the life-long chronic  
311 stage (24). No differences were observed in the bioluminescence-inferred parasite burden  
312 between vaccinated and control mice at the earliest time-point assessed (day 7, post-infection)  
313 (Figs 2B and C). However, by day 15, the peak of the acute stage, the ASP-2/TS vaccinated  
314 mice displayed a 77% reduction in the bioluminescence-inferred parasite burden. This  
315 protective effect was maintained until day 21. By day 28, against a background of immune-  
316 mediated reduction in the parasite burden, there were no significant differences between the  
317 vaccinated and control groups. From that point onwards, the parasite burden remained similar  
318 between the groups (Figs 2B and C). Following termination of the experiment (day 95), *ex vivo*  
319 imaging of internal organs and tissues revealed that the profile of infection in the vaccinated  
320 cohort was typical of the chronic stage. The colon and/or stomach were the major tissues  
321 persistently parasitized, with infections in other organs being sporadic. There were no  
322 apparent differences in the tissue-specific parasite burden between vaccinated and control  
323 mice (Fig 2D). Therefore, although vaccination with the ASP-2/TS constructs can reduce  
324 parasite burden during the acute stage, it does not impact on the long term burden of chronic  
325 infections.

326

327 **Fig 2. Assessing the efficacy of the ASP-2/TS vaccine to protect mice against *T. cruzi***  
328 **infection.** (A) Timeline of vaccination experiment. (B) Assessment of efficacy. Vaccinated  
329 (n=5) and control BALB/c mice (n=3) were infected i.p. with  $10^3$  bioluminescent *T. cruzi*  
330 trypomastigotes and monitored by *in vivo* imaging. Representative ventral images (from a  
331 single mouse in each case) are shown at sequential time points post-infection. All images use  
332 the same  $\log_{10}$ -scale heat-map with minimum and maximum radiance values indicated. (C)  
333 Quantification of whole animal bioluminescence (ventral and dorsal) of vaccinated and control  
334 cohorts (mean  $\pm$  SD). Dashed line indicates background bioluminescence; (\*\*)  $p < 0.01$ , (\*)  
335  $p < 0.05$ . (D) *Ex vivo* bioluminescence imaging. Left-hand image; arrangement of organs and

336 tissues. Insets, representative images of organs from control and vaccinated mice, 95 days  
337 post-infection.

338

339 ***Drug-cured *T. cruzi* infection confers significant protection against challenge with a***  
340 ***homologous strain.***

341 To place the recombinant vaccine results into context, we sought to establish the extent to  
342 which drug-cured infections could enhance the capacity of the murine immune response to  
343 protect against challenge. BALB/C mice were first inoculated i.p. with bioluminescent parasites  
344 (CL Brener strain) (n=12). At three different points post-infection (4, 14 and 36 days) (Fig 3A),  
345 we initiated treatment with benznidazole (100 mg kg<sup>-1</sup>), once daily, for 20 consecutive days.  
346 This dosing regimen was shown to be curative (Supplementary Fig 1), in line with previous  
347 results (47, 48). The plasma concentration of benznidazole falls below the *in vitro* EC<sub>50</sub> value  
348 in approximately 12 h (48). 21 days after the cessation of treatment, the cured mice were re-  
349 infected i.p. and monitored regularly by *in vivo* imaging (Fig 3B and C). 70 days after challenge,  
350 mice found to be bioluminescence-negative were immunosuppressed to facilitate the  
351 outgrowth and dissemination of any residual parasites, then assessed further by *ex vivo*  
352 imaging two weeks later (Fig 3D) (Materials and Methods).

353

354 **Fig 3. Drug-cured infections confer significant protection against challenge with a**  
355 **homologous *T. cruzi* strain.** (A) Outline of strategy. BALB/c mice were infected i.p. with 10<sup>3</sup>  
356 bioluminescent trypanosomes (CL Brener strain) and subjected to curative benznidazole  
357 treatment initiated at various times post-infection. 21 days after the end of treatment, they  
358 were re-infected i.p. and monitored for a further 70 days. Bioluminescence-negative mice were  
359 then immunosuppressed using cyclophosphamide (Materials and Methods) and assessed by  
360 *ex vivo* imaging two weeks later. Results were derived from 2 independent experiments, each  
361 involving 6 mice per cohort. (B) Representative ventral images of benznidazole-cured mice  
362 following re-infection. The number of days at which drug treatment was initiated, following the  
363 primary infection, is indicated (left). All images use the same log<sub>10</sub>-scale heat-map with  
364 minimum and maximum radiance values indicated. (C) Total body bioluminescence (sum of  
365 ventral and dorsal images) of drug-cured mice following re-infection (n=12) (means ± SD)  
366 derived by *in vivo* imaging. The length of the primary infection is indicated (inset). (D)

367 Representative *ex vivo* bioluminescence images. Upper inset, organs from control mouse 70  
368 days post-infection. Central inset, organs from a mouse that was re-infected following curative  
369 treatment initiated on day 36 of the primary infection. On day 70 of the challenge infection,  
370 immunosuppressive treatment was initiated and the organs then harvested. In this instance,  
371 a residual infection was identified. Lower inset, organs from a mouse treated as above, which  
372 was non-infected after challenge.

373

374 When curative treatment was initiated at 36 days post-infection, none of the mice exhibited a  
375 distinct acute stage infection peak following challenge (Figs 3B and C). There was >99%  
376 reduction in the inferred parasite burden in all cases, compared to primary infection control  
377 mice. At the experimental end-point, 6 out of 12 mice were shown to be fully protected (Table  
378 1, Fig 3D, Supplementary Fig 2). In cases where the primary infection was allowed to proceed  
379 for 14 days prior to the initiation of curative benznidazole treatment, the infection profile  
380 following challenge was very similar to the cohort where treatment was initiated 36 days post-  
381 infection. However, a greater number of foci were detectable during the period corresponding  
382 to the acute stage of primary infections (Fig 3B), with full protection achieved in 3 out of 12  
383 mice. In contrast to both of the above, when curative treatment began 4 days after the primary  
384 infection, there was a clear acute stage peak in the bioluminescence profile following  
385 challenge (Fig 3C). The kinetic profile mirrored that in control infected mice, although the  
386 maximum parasite burden was 85% lower, and sterile protection was restricted to a single  
387 mouse (Table 1). Therefore, although the immune response induced by a short course  
388 infection is able to impact on the burden of re-infection, the effect is significantly limited  
389 compared with what is achievable when the primary infection is allowed to progress fully into  
390 the acute stage, prior to treatment.

391

392

393

394

395

396

397 **Table 1. Summary of protection data**

| Preliminary infection strain | Challenge strain | Route of infection | Challenge dose      | Length of primary infection <sup>1</sup> | Period between cure and challenge | Mean parasite reduction <sup>2</sup> | Level of sterile protection |
|------------------------------|------------------|--------------------|---------------------|------------------------------------------|-----------------------------------|--------------------------------------|-----------------------------|
| CL-Brener                    | CL-Brener        | i.p.               | 1 x 10 <sup>3</sup> | 36 days                                  | 21 days                           | >99%                                 | 6/12 <sup>3</sup>           |
| CL-Brener                    | CL-Brener        | i.p.               | 1 x 10 <sup>3</sup> | 14 days                                  | 21 days                           | >99%                                 | 3/12 <sup>3</sup>           |
| CL-Brener                    | CL-Brener        | i.p.               | 1 x 10 <sup>3</sup> | 4 days                                   | 21 days                           | 85%                                  | 1/12 <sup>3</sup>           |
| CL-Brener                    | CL-Brener        | s.c.               | 1 x 10 <sup>3</sup> | 36 days                                  | 21 days                           | >99%                                 | 4/5                         |
| CL-Brener                    | CL-Brener        | i.p.               | 6 x 10 <sup>4</sup> | 36 days                                  | 21 days                           | >99%                                 | 5/6                         |
| CL-Brener                    | CL-Brener        | i.p.               | 1 x 10 <sup>3</sup> | 36 days                                  | 338 days                          | >99%                                 | 4/6                         |
| JR                           | JR               | i.p.               | 1 x 10 <sup>3</sup> | 36 days                                  | 20 days                           | >99%                                 | 1/6                         |
| JR                           | CL-Brener        | i.p.               | 1 x 10 <sup>3</sup> | 36 days                                  | 20 days                           | >99%                                 | 0/6                         |
| CL-Brener                    | JR               | i.p.               | 1 x 10 <sup>3</sup> | 36 days                                  | 20 days                           | >99%                                 | 0/6                         |

398

399 **Footnotes**

400 <sup>1</sup>Period stretching from initial infection to the commencement of drug treatment.

401 <sup>2</sup>Reduction of parasite burden was inferred from total body bioluminescence at the peak of the  
 402 acute stage. When mice inoculated i.p. with bioluminescent *T. cruzi* were assessed by *in vivo*  
 403 imaging, there was a linear relationship between the inoculum size and the whole animal  
 404 bioluminescence for 1000 parasites and above ( $R^2 > 0.99$ ) (24).

405 <sup>3</sup>Data derived from two independent experiments, each n=6.

406

407 To assess whether this protective effect was dependent on the route of inoculation, we  
 408 repeated the 36 day challenge experiment using the subcutaneous (s.c.) route. *T. cruzi*  
 409 transmission normally occurs when parasite-infected faeces from the insect vector are rubbed  
 410 into the wound produced by blood feeding; therefore, s.c. inoculation probably reflects more  
 411 closely how the majority of human infections occur. The mice were inoculated s.c. with 10<sup>3</sup>  
 412 bloodstream trypomastigotes for both the primary and challenge infections, but the protocols  
 413 and treatment timelines were otherwise identical to those used previously (Fig 3A, 36 day  
 414 infection). In control mice, the bioluminescence profile of s.c. infections, and the resulting  
 415 organ-specific tropism during the chronic stage was similar to that in i.p. infections (Figs 4A,  
 416 B and C), as shown previously (24, 25). When the challenge cohort was assessed by *in vivo*



417 imaging (Fig 4A), none of the mice displayed an acute stage peak, and bioluminescence was  
418 at, or close to background levels. At the experimental end-point, all of the mice were  
419 immunosuppressed and then subjected to post-mortem *ex vivo* organ imaging to test for foci  
420 of infection below the limit of *in vivo* detection. 4 out of 5 were found to be bioluminescence  
421 negative in all analyses and were designated as protected (Table 1).

422

423 **Fig 4. Protection conferred by a benznidazole-cured infection is not dependent on the**  
424 **route of infection, size of the challenge inoculum or the time-period until re-infection.**

425 (A) BALB/c mice, infected by the subcutaneous (s.c.) route with  $10^3$  bioluminescent  
426 trypomastigotes (CL Brener strain), were subjected to curative benznidazole treatment 36  
427 days post-infection. 21 days after the end of treatment, they were re-infected (s.c.). Control  
428 mice were also infected by the s.c. route. (B) Total body bioluminescence of drug-cured mice  
429 following s.c. re-infection (means  $\pm$  SD). (C) *Ex vivo* bioluminescence imaging of organs and  
430 carcass from a control and the re-infected mouse that was found to be non-protected after  
431 immunosuppression (Materials and Methods). (D) BALB/c mice infected i.p. with CL Brener  
432 trypomastigotes, were subjected to benznidazole treatment 36 days post-infection. 21 days  
433 after the end of treatment, they were re-infected (i.p.) with  $6 \times 10^4$  trypomastigotes. (E) Total  
434 body bioluminescence of drug-cured mice following re-infection. (F) *Ex vivo* bioluminescence  
435 imaging of organs and carcass of a control and the re-infected mouse that was found to be  
436 non-protected after immunosuppression. (G) As above, BALB/c mice were infected i.p. and  
437 subjected to curative benznidazole treatment. 338 days after the end of treatment, they were  
438 re-infected (i.p.) with  $10^3$  trypomastigotes. (H) Total body bioluminescence of drug-cured mice  
439 following re-infection. The increased mean bioluminescence of the re-infected mice towards  
440 the end of the monitoring period was due to an intense bioluminescence focus in one of the  
441 two non-protected animals. (I) *Ex vivo* bioluminescence imaging of organs and carcass of a  
442 control and a re-infected mouse that was found to be non-protected after immunosuppression.  
443 In all cases, the original cohort size was  $n=6$ . During the course of the s.c. infection experiment  
444 (A-C), one mouse failed to recover from anaesthesia, and was excluded from the analysis.

445

446 It has been reported that the capacity of a cured mouse to resist re-infection is dependent on  
447 the size of the challenge inoculum (49). To investigate this using the *in vivo* imaging system,  
448 mice where curative treatment was initiated 36 days post infection were challenged i.p. with  
449  $6 \times 10^4$  CL Brener trypomastigotes, 60 times the number used previously. The outcome was



450 similar. None of the mice displayed an acute stage parasite burden profile, and only a single  
451 mouse (out of 6) was non-protected (Fig 4D, E and F). Therefore, the level of protection  
452 conferred by a cured infection is similar when a higher challenge inoculum is used.

453

454 We next sought to determine whether protection results from the development of  
455 immunological memory, rather than retention of effector cells from the primary infection.  
456 BALB/c mice were infected i.p. with CL Brener trypomastigotes, and curative benznidazole  
457 treatment was initiated after 36 days. On this occasion, however, the mice were not re-infected  
458 until 338 days after the cessation of treatment. Following homologous challenge, the level of  
459 protection was comparable to that achieved in previous experiments when mice were re-  
460 infected 3 weeks after the last dose of benznidazole. They were able to prevent the onset of  
461 parasite proliferation during the acute stage, and 4 out of 6 mice were fully protected (Figs 4G,  
462 H, and I).

463

#### 464 **Assessing circulating IFN- $\gamma$ <sup>+</sup> T cells in mice after primary infection and challenge**

465 We sought to determine if the duration of the primary infection, prior to commencement of  
466 curative drug treatment, impacted on the extent of the *T. cruzi*-specific immune response to  
467 challenge with homologous parasites. Blood was collected, 2 days prior to re-infection and at  
468 regular intervals thereafter, from mice that had been infected for 4, 14 and 36 days (Fig 5A).  
469 PBMCs were isolated, re-stimulated with an ASP-2 and TS peptide pool, and the IFN- $\gamma$ <sup>+</sup> cell  
470 frequencies measured by ELISpot (Materials and Methods). As expected for mice infected  
471 with *T. cruzi* (50), the control group receiving their first parasite exposure showed a delayed  
472 peptide-specific response, with the frequency of IFN- $\gamma$ <sup>+</sup> cells on day 10 not significantly  
473 different to pre-infection levels. There were substantial increases by days 25 and 40 (Fig 5B),  
474 co-incident with the period when the parasite burden had been controlled and was undergoing  
475 major reduction (Figs 3B and C).

476

477 **Fig 5. The length of the primary infection affects the level of circulating murine IFN- $\gamma$ <sup>+</sup> T**  
478 **cells after challenge.** (A) Timeline of experiment. Infected BALB/c mice were subjected to  
479 curative benznidazole treatment initiated 36, 14 or 4 days post-infection (as in Figure 3). 21  
480 days after the end of treatment, they were re-infected (i.p., 10<sup>3</sup> CL Brener trypomastigotes)  
481 and blood was collected by venesection on the days indicated. (B) ELISpot analysis. PBMCs  
482 were isolated from re-infected mice at pre and post re-infection, as indicated. IFN- $\gamma$ <sup>+</sup> PBMCs  
483 were quantified after overnight stimulation with a 20-mer peptide pool representing the ASP-  
484 2 and TS proteins, as in Figure 1. Data are presented as *ex vivo* IFN- $\gamma$  SFCs per 10<sup>6</sup> PBMCs.  
485 (\*\*\*)  $p < 0.001$ ; (\*)  $p < 0.05$ .

486

487 With benznidazole-cured mice, the pre-challenge levels of circulating *T. cruzi*-specific IFN- $\gamma$ <sup>+</sup>  
488 T cells varied, depending on the duration of the preliminary infection (Fig 5B). Initially, mice  
489 that had been infected for 36 days prior to cure displayed higher levels than the control cohort  
490 (day -2). However, these levels did not increase significantly following re-infection, although  
491 in the case of the day 14 group, there was a slight trend in this direction. In the control group,  
492 the robust adaptive response, which controlled the infection, was associated with levels of  
493 circulating IFN- $\gamma$ <sup>+</sup> T cells that were significantly higher than in any of the benznidazole-cured  
494 mice by 40 days post-challenge (Fig 5B). Mice that had been infected for only 4 days prior to  
495 drug-cure, displayed IFN- $\gamma$ <sup>+</sup> T cell kinetics that were initially more similar to naïve mice  
496 receiving their preliminary infection, with very low levels before and 10 days post-challenge,  
497 followed by a major increase by day 25. The levels decreased thereafter, in contrast to the  
498 control group, where they continued at higher levels until day 40.

499

500 We also examined circulating parasite-specific IFN- $\gamma$ <sup>+</sup> T cells in mice that had been re-infected  
501 338 days after drug cure (Fig 6A). Prior to re-challenge, the levels were similar to those in non-  
502 infected control mice. However, by 10 days post-challenge, there had been a 5-fold increase,  
503 in contrast to the delayed peptide-specific response typical of a *T. cruzi* infection (Fig 6B). This  
504 difference was not maintained, and on days 25 and 40 after challenge, the level of IFN- $\gamma$ <sup>+</sup> T  
505 cells was not significantly different from control mice.

506

507 **Figure 6. Effect of delaying re-infection on the level of circulating murine IFN- $\gamma$ <sup>+</sup> T cells**  
508 **after challenge.** (A) Timeline of experiment. Infected BALB/c mice were cured with  
509 benznidazole treatment, which was initiated 36 days post-infection, as in Figure 5. They were  
510 re-infected 338 days later, and blood samples collected on the days indicated. (B) PBMCs  
511 were isolated from re-infected mice at various time points pre and post re-infection. IFN- $\gamma$ <sup>+</sup>  
512 PBMCs were quantified after overnight stimulation with the 20-mer ASP-2/TS peptide pool. (\*)  
513  $p=0.024$ .

514

### 515 ***The capacity of drug-cured infections to confer a cross-strain protective response***

516 *T. cruzi* displays significant genetic diversity, with the natural population subdivided into 6  
517 lineages known as discrete typing units (DTUs), each of which has the ability to infect humans  
518 (51). We therefore investigated if the capacity to confer homologous protection is a general  
519 feature of *T. cruzi* infections by performing an analogous experiment using JR strain parasites  
520 from the genetically distant TcI lineage). In BALB/c mice, infections with this strain are slightly  
521 slower to reach the peak of the acute stage, but the bioluminescence profile is otherwise  
522 similar to that of the CL Brener strain (DTU VI lineage) (25). Mice were benznidazole-treated  
523 36 days into a JR infection, and re-infected with the same strain 20 days after the end of  
524 treatment (Fig 7A). As before, we observed that the cured infection conferred significant  
525 protection. None of the mice exhibited a distinct acute stage peak, with the majority remaining  
526 close to bioluminescence background levels (Figs 7B and C). However, only a single mouse  
527 (out of 6) exhibited sterile protection when assessed by *ex vivo* imaging following  
528 immunosuppression (Materials and Methods) (Fig 7D).

529

530 **Fig 7. Protection against challenge with a heterologous *T. cruzi* strain.** (A) Outline  
531 strategy. BALB/c mice were infected i.p. with bioluminescent trypomastigotes (CL Brener or  
532 JR strains) and subjected to curative benznidazole treatment initiated 36 days post-infection.  
533 20 days after the end of treatment, they were re-infected as indicated below and monitored for  
534 a further 70 days. Bioluminescence-negative mice were then immunosuppressed and  
535 assessed by *ex vivo* imaging. (B) Ventral images of a representative drug-cured JR infected  
536 mouse (n=6) following re-infection with the homologous JR strain. All images use the same  
537 log<sub>10</sub>-scale heat-map shown in Fig 2. (C) Total body bioluminescence (sum of ventral and

538 dorsal images) of drug-cured JR infected mice re-infected with the JR strain (means  $\pm$  SD).  
539 (D) *Ex vivo* bioluminescence imaging of organs and carcass of a control and re-infected mouse  
540 (non-protected). (E) Ventral images of a representative drug-cured CL Brener infected mouse  
541 (n=6) following re-infection with the JR strain. (F) Total body bioluminescence of drug-cured  
542 CL Brener infected mice re-infected with the JR strain. (G) *Ex vivo* bioluminescence imaging  
543 of organs and carcass of a control and re-infected mouse (non-protected). (H) Ventral images  
544 of a representative drug-cured JR infected mouse (n=6) following re-infection with the CL  
545 Brener strain. (I) Total body bioluminescence of drug-cured JR infected mice re-infected with  
546 the CL Brener strain. (J) *Ex vivo* bioluminescence imaging of organs and carcass of a control  
547 and re-infected mouse (non-protected).

548

549 To assess the scope for vaccine-induced species-wide immunity, we next investigated the  
550 effectiveness of protection conferred against a heterologous challenge using the strains CL  
551 Brener (TcVI) and JR (Tcl). Following the strategy outlined above, BALB/c mice were infected  
552 i.p. with  $10^3$  bloodstream CL Brener or JR trypomastigotes, benznidazole-treated, and then  
553 challenged with the heterologous strain 20 days after the end of the curative therapy. In both  
554 experiments, we observed a strong protective response (>99%) (Figs 7E-J), with no distinct  
555 acute stage peak and a reduced number of bioluminescent foci in the period corresponding to  
556 the transition to the chronic stage. However, in both cases, all mice exposed to cross-strain  
557 challenge displayed small but clear parasite foci following re-infection. None exhibited sterile  
558 protection when examined by *ex vivo* imaging, with each displaying the type of GI tract  
559 infections characteristic of the chronic stage (Figs 7G and J). Therefore, although infection  
560 with a heterologous strain can have a major impact on the subsequent parasite burden, it did  
561 not confer sterile immunity in any of the mice examined.

562

563

564

565

566

567

568 **DISCUSSION**

569 Although experimental *T. cruzi* vaccines have been widely shown to reduce the burden of  
570 infection in animal models (27-35), there is little unambiguous evidence for sterile protection.  
571 Despite this, there have been an increasing number of reports that vaccination could have  
572 therapeutic benefits in terms of decreased cardiac pathology (33, 52-54). Therefore, the  
573 question as to whether the development of a Chagas disease vaccine might be a practical  
574 option for reducing the public health impact of this infection remains unanswered. Detailed  
575 assessment has been limited by difficulties in detecting the intermittent low-level parasitemia  
576 of chronic stage infections, and in identifying the tissue/organ location of persistent parasites.  
577 Here, we demonstrate that highly sensitive bioluminescent imaging can negate some of these  
578 issues, and provide novel insights into vaccine efficacy.

579

580 Initially, we tested the protective properties of two viral vectors (MVA and ChAdOx1) that had  
581 been modified to express an ASP-2/TS fusion gene (Fig 1). The reduction in peak parasite  
582 burden (77%, Fig 2C) was in a range similar to that reported for other recombinant *T. cruzi*  
583 vaccines (55-57, as examples). Interestingly, vaccination had no impact on the parasite  
584 burden once the infection had transitioned to the chronic phase, suggesting that if parasites  
585 can survive until this stage of the disease, they are less susceptible to clearance by vaccine-  
586 induced immunity. This has not been reported previously. At the experimental end-point, the  
587 remaining parasites were restricted predominantly to the GI tract (Fig 2D). In BALB/c and other  
588 mice, this location serves as a permissive niche, enabling parasites to persist in an otherwise  
589 hostile immune environment (24, 25, 37), although the mechanism(s) for this have yet to be  
590 elucidated. To determine if this might limit the utility of a Chagas disease vaccine, we therefore  
591 investigated the protective effect of benznidazole-cured infections, on the basis that these  
592 should provide optimal levels of immunity. Curative treatment has been associated with the  
593 development of a stable anti-*T. cruzi* CD8<sup>+</sup> T cell population (22).

594

595 Drug-cure was initiated after infection for 36 days (a time-point when the adaptive CD8<sup>+</sup> T cell  
596 response is controlling the infection), 14 days (the peak of the acute stage), and 4 days (just  
597 short of one complete round of the intracellular replication cycle that leads to differentiation  
598 and parasite egress) (Fig 3). Mice infected for 36 days prior to benznidazole treatment were  
599 highly protected from challenge (Fig 3B), with complete absence of a typical acute stage peak.  
600 However, sterile protection was only achieved in half of the re-infected mice (Table 1).  
601 Therefore, although drug-cured infections can generate a highly effective immune response,  
602 that prevents a second acute phase, parasites that evade this initial encounter seem to be  
603 refractory to immune-mediated elimination and are able to persist long term. This outcome  
604 was not significantly influenced by the size of the challenge inoculum or the route of infection  
605 (Fig 4). Initiating treatment after 14 days was also able to prevent a detectable acute stage  
606 peak in bioluminescence when the mice were challenged, although there was a slight  
607 reduction in the level of sterile protection (Fig 3B, Table 1). In contrast, when drug-cure was  
608 initiated after 4 days, a pronounced post-challenge acute stage peak could be observed, but  
609 even then, the parasite burden was 85% lower than in a naive infection. Therefore, 14 days  
610 exposure to an untreated infection is sufficient for the induction of a robust immune response,  
611 whereas with 4 days, the response appears to be less developed, although still sufficient to  
612 have a significant impact on the parasite burden.

613

614 A delayed onset of the CD8<sup>+</sup> T cell response is a characteristic feature of Chagas disease  
615 (58), with the first round of intracellular infections passing largely undetected by the immune  
616 system. Upon invasion of mammalian cells, parasites rapidly escape from the phagolysosome,  
617 there is down-modulation of the host cell immunoproteasome (59), and minimal activation of  
618 the host-pattern recognition receptors. Induction of effective innate immunity requires a full  
619 cycle of parasite replication, host cell lysis, and the release of trypomastigotes into the  
620 extracellular milieu, a process that takes at least 4-5 days. This is followed by the production  
621 of pathogen-associated and damage-associated molecular patterns that promote innate  
622 immune responses, allowing parasitized cells to flag up their infected status by MHC class I

623 antigen presentation. Full development of the CD8<sup>+</sup> T cell response to *T. cruzi* infections takes  
624 around 3 weeks (58). In mice where curative treatment was initiated 14 or 36 days post-  
625 infection, circulating parasite peptide-specific IFN- $\gamma$ <sup>+</sup> T cells were readily detectable prior to  
626 challenge (Fig 5B), and were associated with protection against the development of a second  
627 acute phase profile. In many cases, this response was sufficient to promote complete  
628 elimination of the secondary infection. Experimental challenge did not lead to a significant  
629 increase in the level of IFN- $\gamma$ <sup>+</sup> T cells, suggesting that the pre-existing effector population was  
630 able to contain the secondary infection without further induction. Even when preliminary  
631 infection did not confer sterile protection, there was no further enhancement of the peptide-  
632 specific response. Therefore, if parasites in the challenge inoculation can avoid early  
633 elimination, and are able to establish a long term chronic infection, it appears that they survive  
634 in an environment or state that does not trigger additional T cell activation.

635

636 In mice where curative treatment was initiated 4 days into the primary infection, the level of *T.*  
637 *cruzi*-specific IFN- $\gamma$ <sup>+</sup> T cells prior to re-infection was negligible, and the kinetics of the response  
638 induced over the first 25 days of the challenge infection was similar to that in the controls (Fig  
639 5). Despite this, there was an 85% reduction in the parasite burden at the peak of the re-  
640 infection. Therefore, the induced partially protective effect in these mice is conferred either by  
641 an extremely low level of circulating parasite-specific IFN- $\gamma$ <sup>+</sup> T cells, or by other factors that  
642 operate to moderate the infection. In mice challenged almost a year after curative treatment  
643 of the primary infection, the level of protection was similar to mice in which the gap between  
644 the end of treatment and challenge was only ~20 days. However, unlike these mice, re-  
645 infection after almost a year was accompanied by induction of peptide-specific T cells, with  
646 kinetics that were more rapid than in the naive control cohort (Fig 6). This evidence for a  
647 memory response suggests that vaccine-mediated long term protection against fulminant *T.*  
648 *cruzi* infection may be a feasible goal. Furthermore, if these results can be extrapolated to  
649 humans, it would imply that patients who have undergone curative drug treatment should have  
650 the added benefit of a high level of long term protection against re-infection.



651

652 We also investigated the extent to which benznidazole-cured infections could provide cross-  
653 strain protection. *T. cruzi* is highly diverse, with six major genetic lineages that display  
654 considerable geographic overlap. Taxonomy is further complicated by the widespread  
655 existence of hybrid strains (60). Mice initially infected with the *T. cruzi* CL Brener (TcVI) were  
656 challenged with the JR strain (TcI), and vice-versa. Although, suppression of the parasite  
657 burden was similar to that in a homologous challenge (>99%), sterile protection was not  
658 achieved (Fig 7), with surviving parasites persisting at very low levels. We have suggested a  
659 model for chronic Chagas disease (37) in which the gut (and perhaps other tissues, such as  
660 the skin or skeletal muscle) acts as an immunologically tolerant reservoir for *T. cruzi*  
661 persistence, with periodic trafficking to other sites, where the parasites are then destroyed  
662 rapidly by immune effector mechanisms. In the heart, this can lead to cumulative collateral  
663 damage that ultimately gives rise to cardiac pathology (61).

664

665 We propose that when parasites establish infections in the GI tract, or other permissive sites,  
666 they become refractory to elimination by the vigorous adaptive responses induced by drug-  
667 cured infections. Thus, the effectiveness of a Chagas disease vaccine could depend on the  
668 efficiency with which the primed immune system prevents *T. cruzi* from reaching the relative  
669 safety of these sites of persistence, and its ability to maintain this response over time against  
670 a wide range of strains. The results presented here, and elsewhere (31-34, 44, 45, 52-57),  
671 highlight the possibility that current subunit/DNA vaccines may be unable to fulfil these  
672 requirements, although their ability to prevent lethal outcomes (31-34, 44, 45, 53, 56) and  
673 provide therapeutic benefits (33, 52-55, 57) merits further research. As we have shown here  
674 however, the long term protection conferred by live infection, followed by drug-mediated cure,  
675 suggests that the use of genetically attenuated parasite strains may be the best approach to  
676 achieving an effective vaccine.

677

678



679 **ACKNOWLEDGEMENTS**

680 We thank Helena Helmbj and Julius Hafalla (LSHTM) for advice and guidance.

681

682

683

684 **REFERENCES**

685 1. Hashimoto K, Yoshioka, K. Review: surveillance of Chagas disease. *Adv Parasitol.* 2011;79:  
686 375-428.

687 2. Bern C. Chagas' Disease. *N Eng J Med.* 2015;373: 456-466.

688 3. Lee BY, Bacon KM, Bottazzi ME, Hotez PJ. Global economic burden of Chagas disease: a  
689 computational simulation model. *Lancet Infect Dis.* 2013;13: 342–348.

690 4. Bustamante J, Tarleton R. Reaching for the Holy Grail: insights from infection/cure models  
691 on the prospects for vaccines for *Trypanosoma cruzi* infection. *Mem Inst Oswaldo Cruz.*  
692 2015;110: 445-451.

693 5. Ribeiro AL, Nunes MP, Teixeira MM, Rocha MO. Diagnosis and management of Chagas  
694 disease and cardiomyopathy. *Nat Rev Cardiol.* 2012;9: 576-589.

695 6. Cunha-Neto E, Chevillard C. Chagas disease cardiomyopathy: immunopathology and  
696 genetics. *Mediat Inflamm.* 2014;2014: 683230.

697 7. Bonney KM. Chagas disease in the 21st century: a public health success or an emerging  
698 threat? *Parasite.* 2014;21: 11.

699 8. Dias JC. Evolution of Chagas disease screening programs and control programs: Historical  
700 perspective. *Global Heart.* 2015;10: 193-202.

701 9. Sosa-Estani S, Segura EL. Integrated control of Chagas disease for its elimination as public  
702 health problem - a review. *Mem Inst Oswaldo Cruz.* 2015;110: 289-298.

703 10. Wilkinson SR, Kelly JM. Trypanocidal drugs: mechanisms, resistance and new targets.  
704 *Exp Rev Molec Med.* 2009;11: e31, pp1-24.

705 11. Gaspar L, Moraes CB, Freitas-Junior LH, Ferrari S, Costantino L, Costi MP, et al. Current  
706 and future chemotherapy for Chagas disease. *Curr Med Chem.* 2015;22: 4293-4312.

- 707 12. Chatelain E. Chagas disease research and development: Is there light at the end of the  
708 tunnel? *Comput Struct Biotech J*. 2016;15: 98-103.
- 709 13. Iwai LK, Juliano MA, Juliano L, Kalil J, Cunha-Neto E. T-cell molecular mimicry in Chagas  
710 disease: identification and partial structural analysis of multiple cross-reactive epitopes  
711 between *Trypanosoma cruzi* B13 and cardiac myosin heavy chain. *J Autoimmun*. 2005;24:  
712 111-117.
- 713 14. Bermejo DA, Amezcua Vesely MC, Khan M, Acosta Rodríguez EV, Montes CL, Merino  
714 MC, et al. *Trypanosoma cruzi* infection induces a massive extrafollicular and follicular splenic  
715 B-cell response which is a high source of non-parasite-specific antibodies. *Immunol*.  
716 2011;132: 123-133.
- 717 15. Kierszenbaum F. Where do we stand on the autoimmunity hypothesis of Chagas disease?  
718 *Trends Parasitol*. 2005;21: 513-516.
- 719 16. Gutierrez FR, Guedes PM, Gazzinelli RT, Silva JS. The role of parasite persistence in  
720 pathogenesis of Chagas heart disease. *Parasitol Immunol*. 2009;31: 673-685.
- 721 17. Bonney KM, Engman DM. Autoimmune pathogenesis of Chagas heart disease: looking  
722 back, looking ahead. *Amer J Pathol*. 2015;185: 1537-1547.
- 723 18. Tarleton RL. CD8+ T cells in *Trypanosoma cruzi* infection. *Semin Immunopathol* 2015;37:  
724 233-238.
- 725 19. Bonney KM, Luthringer DJ, Kim SA, Garg NJ, Engman DM. Pathology and pathogenesis  
726 of Chagas heart disease. *Annu Rev Pathol*. 2019;14: 421-447.
- 727 20. Kayama H, Takeda K. The innate immune response to *Trypanosoma cruzi* infection.  
728 *Microbes Infect*. 2010;12: 511–517.
- 729 21. Campos MA, Gazzinelli RT. *Trypanosoma cruzi* and its components as exogenous  
730 mediators of inflammation recognized through Toll-like receptors. *Mediat Inflamm*. 2014;13:  
731 139–143.
- 732 22. Bustamante JM, Bixby LM, Tarleton RL. Drug-induced cure drives conversion to a stable  
733 and protective CD8+ T central memory response in chronic Chagas disease. *Nat Med*.  
734 2008;14: 542–550.

- 735 23. Martin DL, Weatherly DB, Laucella SA, Cabinian MA, Crim MT, Sullivan S, et al. CD8+ T-  
736 Cell responses to *Trypanosoma cruzi* are highly focused on strain-variant trans-sialidase  
737 epitopes. PLoS Pathogens. 2006;2: e77.
- 738 24. Lewis MD, Fortes Francisco A, Taylor MC, Burrell-Saward H, McLatchie AP, Miles MA, et  
739 al. Bioluminescence imaging of chronic *Trypanosoma cruzi* infections reveals tissue-specific  
740 parasite dynamics and heart disease in the absence of locally persistent infection. Cell  
741 Microbiol. 2014;16: 1285-1300.
- 742 25. Lewis MD, Fortes Francisco A, Taylor MC, Jayawardhana S, Kelly, JM. Host and parasite  
743 genetics shape a link between *Trypanosoma cruzi* infection dynamics and chronic  
744 cardiomyopathy. Cell Microbiol. 2016;18: 1429-1443.
- 745 26. Pack AD, Collins MH, Rosenberg CS, Tarleton RL. Highly competent, non-exhausted  
746 CD8+ T cells continue to tightly control pathogen load throughout chronic *Trypanosoma cruzi*  
747 infection. PLoS Pathog. 2018;14: e1007410.
- 748 27. Rodríguez-Morales O, Monteón-Padilla V, Carrillo-Sánchez SC, Rios-Castro M, Martínez-  
749 Cruz M, Carabarin-Lima A, et al. Experimental vaccines against Chagas Disease: A journey  
750 through history. J Immunol Res. 2015;2015: 489758.
- 751 28. Pizzi T, Prager R. Immunity to infection induced by culture of *Trypanosoma cruzi* of  
752 attenuated virulence; preliminary communication, Boletín Informat Parasitología Chilena.  
753 1952;7: 20–21.
- 754 29. Perez Brandan C, Padilla AM, Xu D, Tarleton RL, Basombrio MA. Knockout of the *dhfr-ts*  
755 gene in *Trypanosoma cruzi* generates attenuated parasites able to confer protection against  
756 a virulent challenge. PLoS Negl Trop Dis. 2011;5: e1418.
- 757 30. Ruiz AM, Esteva M, Cabeza Meckert P, Laguens RP, Segura EL. Protective immunity and  
758 pathology induced by inoculation of mice with different subcellular fractions of *Trypanosoma*  
759 *cruzi*. Acta Tropica. 1985;42: 299–309.
- 760 31. Wrightsman RA, Miller MJ, Saborio JL, Manning JE. Pure paraflagellar rod protein protects  
761 mice against *Trypanosoma cruzi* infection. Infect Immun. 1995;63: 122–125.

- 762 32. Luhrs KA, Fouts DL, Manning JE. Immunization with recombinant paraflagellar rod protein  
763 induces protective immunity against *Trypanosoma cruzi* infection. *Vaccine*. 2003;21: 3058–  
764 3069.
- 765 33. Gupta S, Garg NJ. TcVac3 induced control of *Trypanosoma cruzi* infection and chronic  
766 myocarditis in mice. *PLoS ONE*. 2013;8: e59434.
- 767 34. Nogueira RT, Nogueira AR, Pereira MC, Rodrigues MM, Neves PC, Galler R, et al.  
768 Recombinant yellow fever viruses elicit CD8+ T cell responses and protective immunity  
769 against *Trypanosoma cruzi*. *PLoS ONE*. 2013;8: e59347.
- 770 35. Vasconcelos JR, Dominguez MR, Neves RL, Ersching J, Araújo A, Santos LI, et al.  
771 Adenovirus vector-induced CD8+ T effector memory cell differentiation and recirculation, but  
772 not proliferation, are important for protective immunity against experimental *Trypanosoma*  
773 *cruzi* infection. *Hum Gene Ther*. 2014;25: 350–363.
- 774 36. Lewis MD, Fortes Francisco A, Taylor MC, Kelly JM. A new experimental model for  
775 assessing drug efficacy against *Trypanosoma cruzi* infection based on highly sensitive in vivo  
776 imaging. *J Biomolec Screen*. 2015;20: 36-43.
- 777 37. Lewis MD, Kelly JM. Putting *Trypanosoma cruzi* dynamics at the heart of Chagas disease.  
778 *Trends Parasitol*. 2016;32: 899-911.
- 779 38. Sánchez-Valdéz FJ, Padilla A, Wang W, Orr D, Tarleton RL. Spontaneous dormancy  
780 protects *Trypanosoma cruzi* during extended drug exposure. *Elife*. 2018;7: e34039.
- 781 39. Branchini BR, Ablamsky DM, Davis AL, Southworth TL, Butler B, Fan F, et al. Red-emitting  
782 luciferases for bioluminescence reporter and imaging applications. *Anal Biochem*. 2010; 396:  
783 290-297.
- 784 40. Fang J, Qian JJ, Yi S, Harding TC, Tu GH, VanRoey M, et al. Stable antibody expression  
785 at therapeutic levels using the 2A peptide. *Nat Biotechnol*. 2005;23: 584-590.
- 786 41. Dicks MD, Spencer AJ, Edwards NJ, Wadell G, Bojang K, Gilbert SC, et al. A novel  
787 chimpanzee adenovirus vector with low human seroprevalence: improved systems for vector  
788 derivation and comparative immunogenicity. *PLoS ONE*. 2012;7: e40385.

- 789 42. Gomez CE, Perdiguero B, Garcia-Arriaza J, Esteban M. Clinical applications of attenuated  
790 MVA poxvirus strain. *Exp Rev Vacc*. 2013;12: 1395-1416.
- 791 43. S.C. Gilbert. Clinical development of modified vaccinia virus Ankara vaccines. *Vaccine*.  
792 2013;31: 4241-4246.
- 793 44. Costa F, Franchin G, Pereira-Chioccola VL, Ribeirão M, Schenkman S, Rodrigues MM.  
794 Immunization with a plasmid DNA containing the gene of trans-sialidase reduces  
795 *Trypanosoma cruzi* infection in mice. *Vaccine*. 1998;16: 768-774.
- 796 45. Boscardin SB, Kinoshita SS, Fujimura AE, Rodrigues MM. Immunization with cDNA  
797 expressed by amastigotes of *Trypanosoma cruzi* elicits protective immune response against  
798 experimental infection. *Infect Immun*. 2003;71: 2744-2757.
- 799 46. Machado AV, Cardoso JE, Claser C, Rodrigues MM, Gazzinelli RT, Bruna-Romero O.  
800 Long-term protective immunity induced against *Trypanosoma cruzi* infection after vaccination  
801 with recombinant adenoviruses encoding amastigote surface protein-2 and trans-sialidase.  
802 *Hum Gene Ther*. 2006;17: 898-908.
- 803 47. Fortes Francisco A, Lewis MD, Jayawardhana S, Taylor MC, Chatelain E, Kelly JM. The  
804 limited ability of posaconazole to cure both acute and chronic *Trypanosoma cruzi* infections  
805 revealed by highly sensitive *in vivo* imaging. *Antimicrob Agents Chemother*. 2015;59: 4653-  
806 4661.
- 807 48. Francisco AF, Jayawardhana S, Lewis MD, White KL, Shackelford DM, Chen G, et al.  
808 Nitroheterocyclic drugs cure experimental *Trypanosoma cruzi* infections more effectively in  
809 the chronic stage than in the acute stage. *Sci Rep*. 2016;6: 35351.
- 810 49. Cabeza Meckert P, Chambo JG, Laguens RP. Differences in resistance to reinfection with  
811 low and high inocula of *Trypanosoma cruzi* in chagasic mice treated with nifurtimox and  
812 relation to immune response. *Antimicrob Agents Chemother*. 1998;32: 241-245.
- 813 50. Tzelepis F, de Alencar BC, Penido ML, Gazzinelli RT, Persechini PM, Rodrigues MM.  
814 Distinct kinetics of effector CD8+ cytotoxic T cells after infection with *Trypanosoma cruzi* in  
815 naive or vaccinated mice. *Infect Immun*. 2006;74: 2477-2481.

- 816 51. Messenger LA, Miles MA, Bern C. Between a bug and a hard place: *Trypanosoma cruzi*  
817 genetic diversity and the clinical outcomes of Chagas disease. *Exp Rev Anti-infect Ther.*  
818 2015;13: 995-1029.
- 819 52. Gupta S, Garg NJ. Prophylactic efficacy of TcVac2 against *Trypanosoma cruzi* in mice.  
820 *PLoS Negl Trop Dis.* 2010;4: e797.
- 821 53. Arce-Fonseca M, Rios-Castro M, Carrillo-Sánchez Sdel C, Martínez-Cruz M, Rodríguez-  
822 Morales O. Prophylactic and therapeutic DNA vaccines against Chagas disease. *Parasit*  
823 *Vectors.* 2015;8: 121.
- 824 54. Barry MA, Versteeg L, Wang Q, Pollet J, Zhan B, Gusovsky F, et al. A therapeutic vaccine  
825 prototype induces protective immunity and reduces cardiac fibrosis in a mouse model of  
826 chronic *Trypanosoma cruzi* infection. *PLoS Negl Trop Dis.* 2019;13: e0007413.
- 827 55. de la Cruz JJ, Villanueva-Lizama L, Dzul-Huchim V, Ramírez-Sierra MJ, Martínez-Vega  
828 P, Rosado-Vallado M, et al. Production of recombinant TSA-1 and evaluation of its potential  
829 for the immuno-therapeutic control of *Trypanosoma cruzi* infection in mice. *Hum Vaccine*  
830 *Immunother.* 2019;15: 210-219.
- 831 56. Arce-Fonseca M, González-Vázquez MC, Rodríguez-Morales O, Graullera-Rivera V,  
832 Aranda-Fraustro A, Reyes PA, et al. Recombinant enolase of *Trypanosoma cruzi* as a novel  
833 vaccine candidate against Chagas disease in a mouse model of acute infection. *J Immunol*  
834 *Res.* 2018;2018: 8964085.
- 835 57. Martínez-Campos V, Martínez-Vega P, Ramírez-Sierra MJ, Rosado-Vallado M, Seid CA,  
836 Hudspeth EM, et al. Expression, purification, immunogenicity, and protective efficacy of a  
837 recombinant Tc24 antigen as a vaccine against *Trypanosoma cruzi* infection in mice. *Vaccine.*  
838 2015;33: 4505-4512.
- 839 58. Padilla AM, Simpson, LJ, Tarleton RL. Insufficient TLR activation contributes to the slow  
840 development of CD8+ T cell responses in *Trypanosoma cruzi* infection. *J Immunol.* 2009;183:  
841 1245-1252.

- 842 59. Camargo R, Faria LO, Kloss A, Favali CB, Kuckelkorn U, Kloetzel PM, et al. *Trypanosoma*  
843 *cruzi* infection down-modulates the immunoproteasome biosynthesis and the MHC class I cell  
844 surface expression in HeLa cells PLoS One. 2014;9: e95977.
- 845 60. Francisco AF, Jayawardhana S, Lewis MD, Taylor MC, Kelly JM. Biological factors that  
846 impinge on Chagas disease drug development. Parasitol. 2017;144: 1871-1880.
- 847 61. Francisco AF, Jayawardhana S, Taylor MC, Lewis MD, Kelly JM. Assessing the  
848 effectiveness of curative benznidazole treatment in preventing chronic cardiac pathology in  
849 experimental models of Chagas disease. Antimicrob Agents Chemother. 2018;62: e00832-18.
- 850 62. Collins MH, Craft JM, Bustamante JM, Tarleton RL. Oral exposure to *Trypanosoma cruzi*  
851 elicits a systemic CD8<sup>+</sup> T cell response and protection against heterotopic challenge. Infect  
852 Immun. 2011;79: 3397-3406.
- 853
- 854
- 855
- 856
- 857
- 858
- 859
- 860
- 861
- 862
- 863
- 864
- 865
- 866
- 867
- 868
- 869

870 **SUPPLEMENTARY INFORMATION**

871

872 **Supplementary Figure 1. Assessing the curative ability of benznidazole.** (A, B) *In vivo*  
873 imaging of BALB/c mice infected with CL Brener (A) and (JR) strains of *T. cruzi*. Treatment  
874 with benznidazole, 100 mg kg<sup>-1</sup> once daily by the oral route for 20 days, was initiated 36 days  
875 post-infection. Following cessation of treatment, mice were immunosuppressed with 3 doses  
876 of 200 mg kg<sup>-1</sup> cyclophosphamide (Materials and Methods). All images use the same log<sub>10</sub>-  
877 scale heat-map with minimum and maximum radiance values indicated. (C and D) Total body  
878 bioluminescence (sum of ventral and dorsal images) of CL Brener (C) and JR (D) infected  
879 mice. Dashed lines indicate background bioluminescence. All images use the same log<sub>10</sub>-  
880 scale heat-map with minimum and maximum radiance values indicated. (E and F) *Ex vivo*  
881 bioluminescence imaging of organs and carcasses from CL Brener (E) and JR (F) infected  
882 mice at the experimental end-point. A minor bioluminescent focus was observed in the adipose  
883 tissue of mouse 1 (JR infection). Mouse 2 (CL Brener infection) was euthanised prior to day  
884 89, due to weight loss during immunosuppressive treatment. It was negative by both *in vivo*  
885 and *ex vivo* imaging.

886

887 **Supplementary Figure 2. Benznidazole-cured infections confer significant protection**  
888 **against re-challenge with the *T. cruzi* CL Brener strain.** (A) Timeline. BALB/c mice infected  
889 i.p. with 10<sup>3</sup> trypomastigotes (CL Brener strain) were subjected to curative benznidazole  
890 treatment initiated 36 days post-infection. 23 days after the end of treatment, they were re-  
891 infected i.p. After a further 75 days, the mice were immunosuppressed using  
892 cyclophosphamide (red stars) and assessed by *ex vivo* imaging. (B) Ventral and dorsal  
893 bioluminescence images from a cohort of 6 mice. The days post re-infection are indicated  
894 (left). All images use the same log<sub>10</sub> scale heat-map with minimum and maximum radiance  
895 values indicated. (C) *Ex vivo* bioluminescence imaging of organs and carcasses harvested at  
896 the experimental end-point. (D) Total body bioluminescence (sum of ventral and dorsal  
897 images) of drug-cured mice following re-infection (means ± SD) derived by *in vivo* imaging.  
898 Mice 3 and 4 were designated as non-protected on the basis of *in vivo* and/or *ex vivo* imaging.  
899



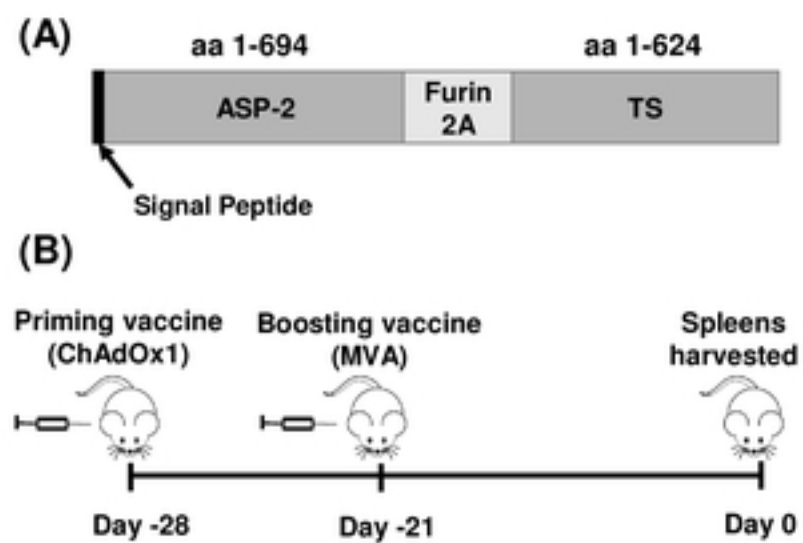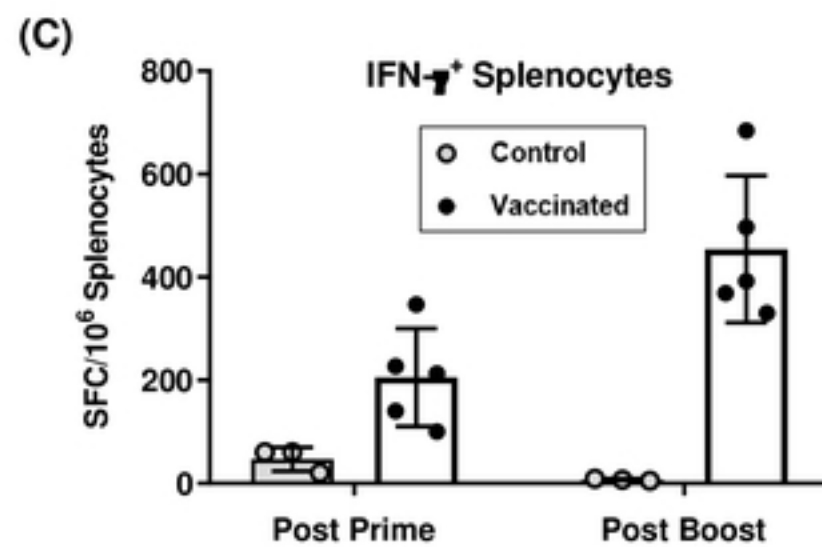

Figure 1

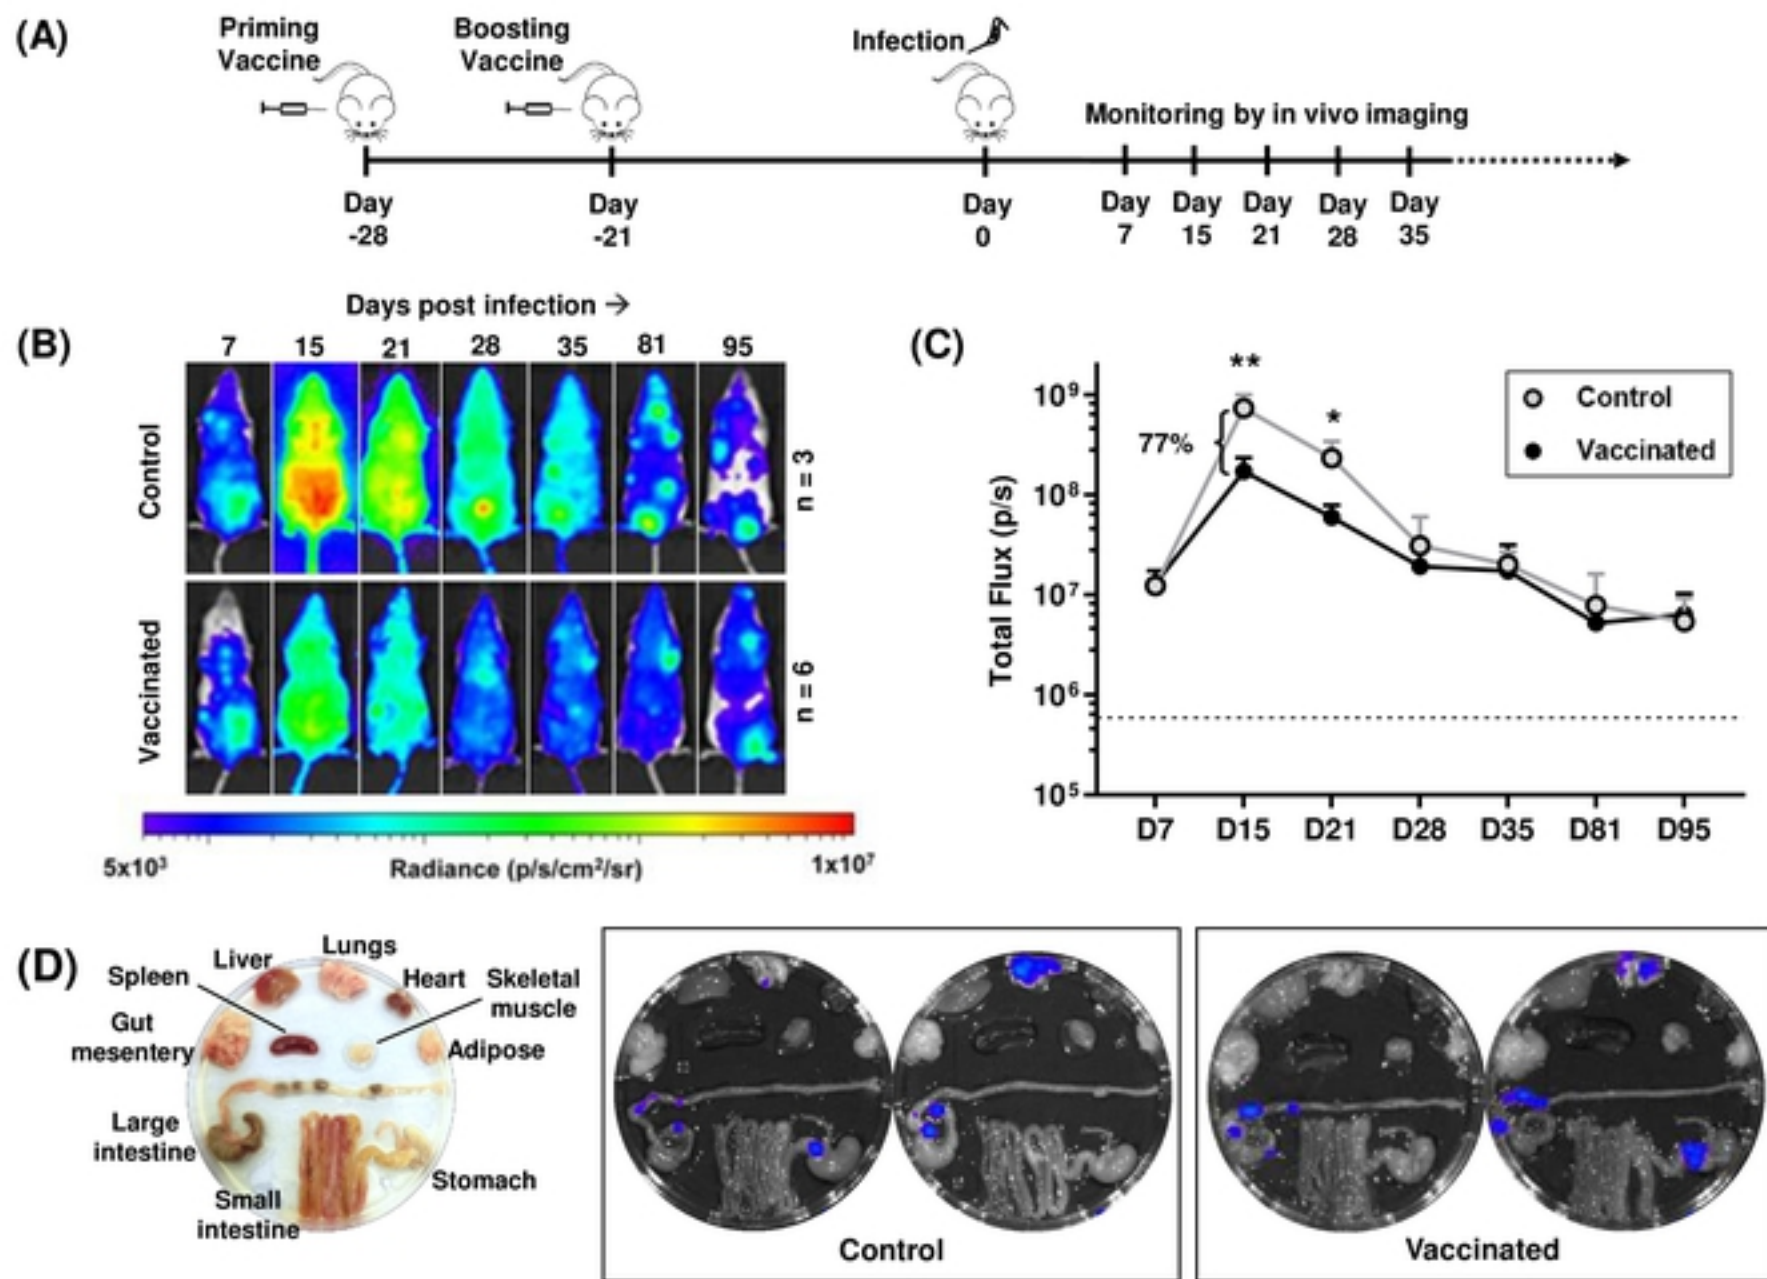

Figure 2

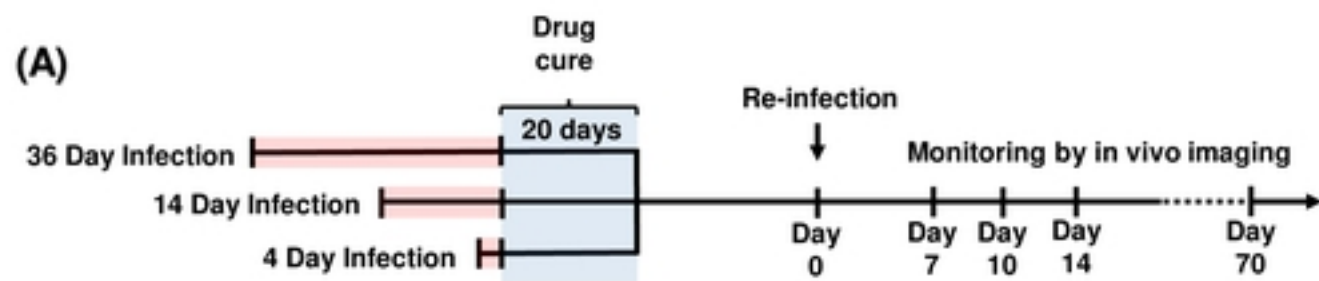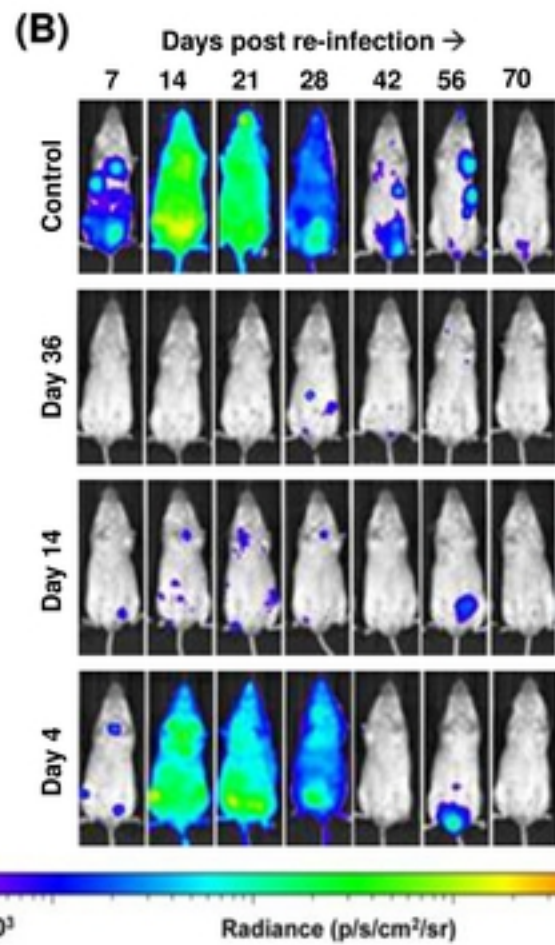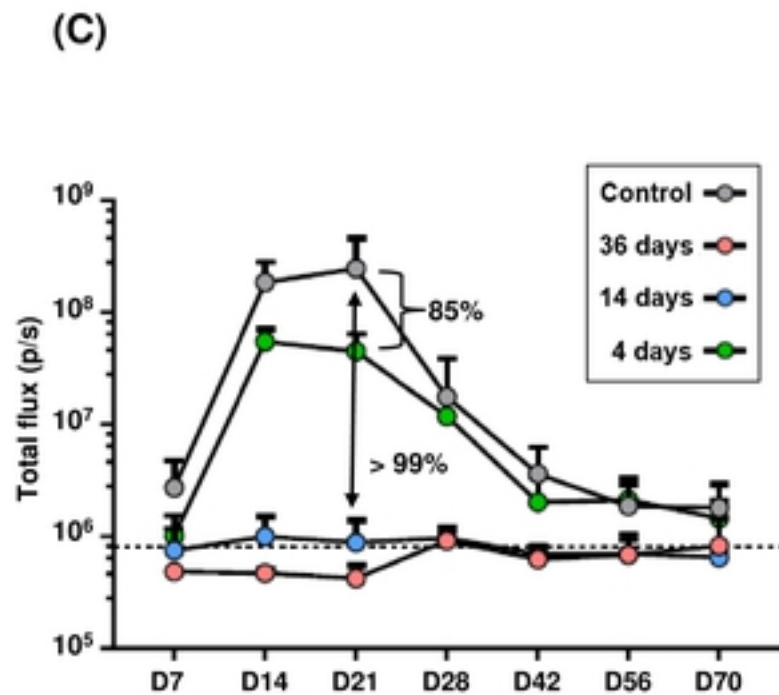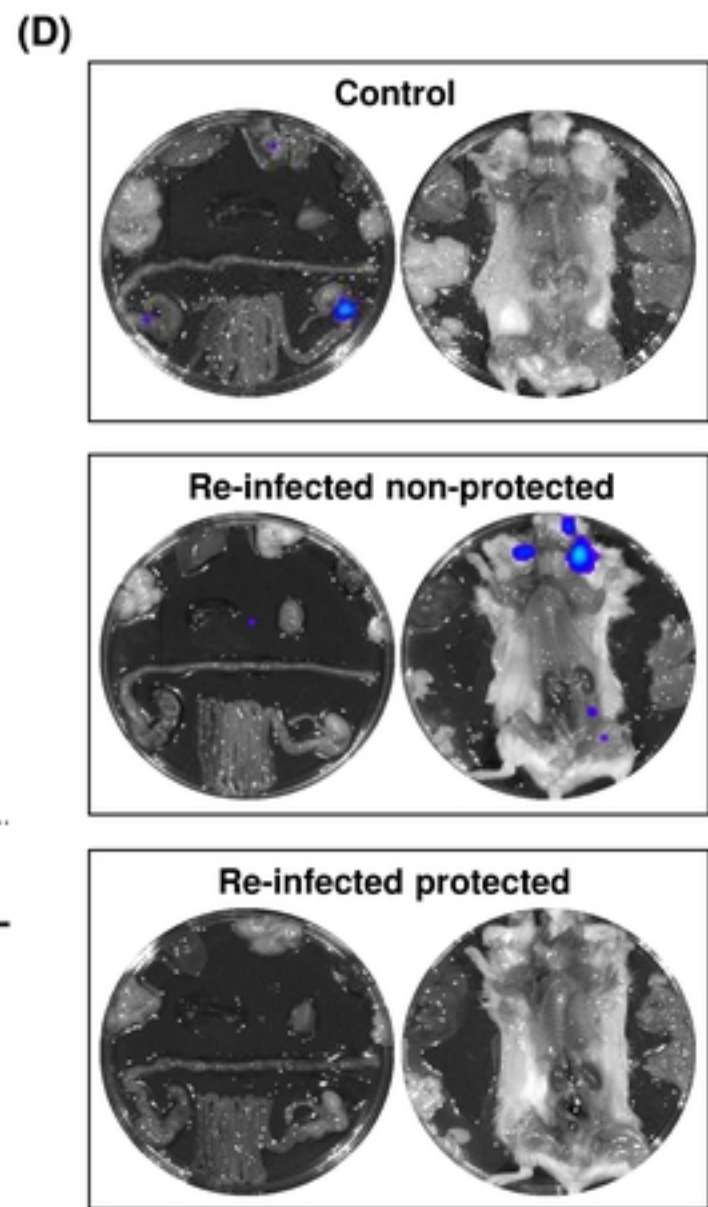

Figure 3



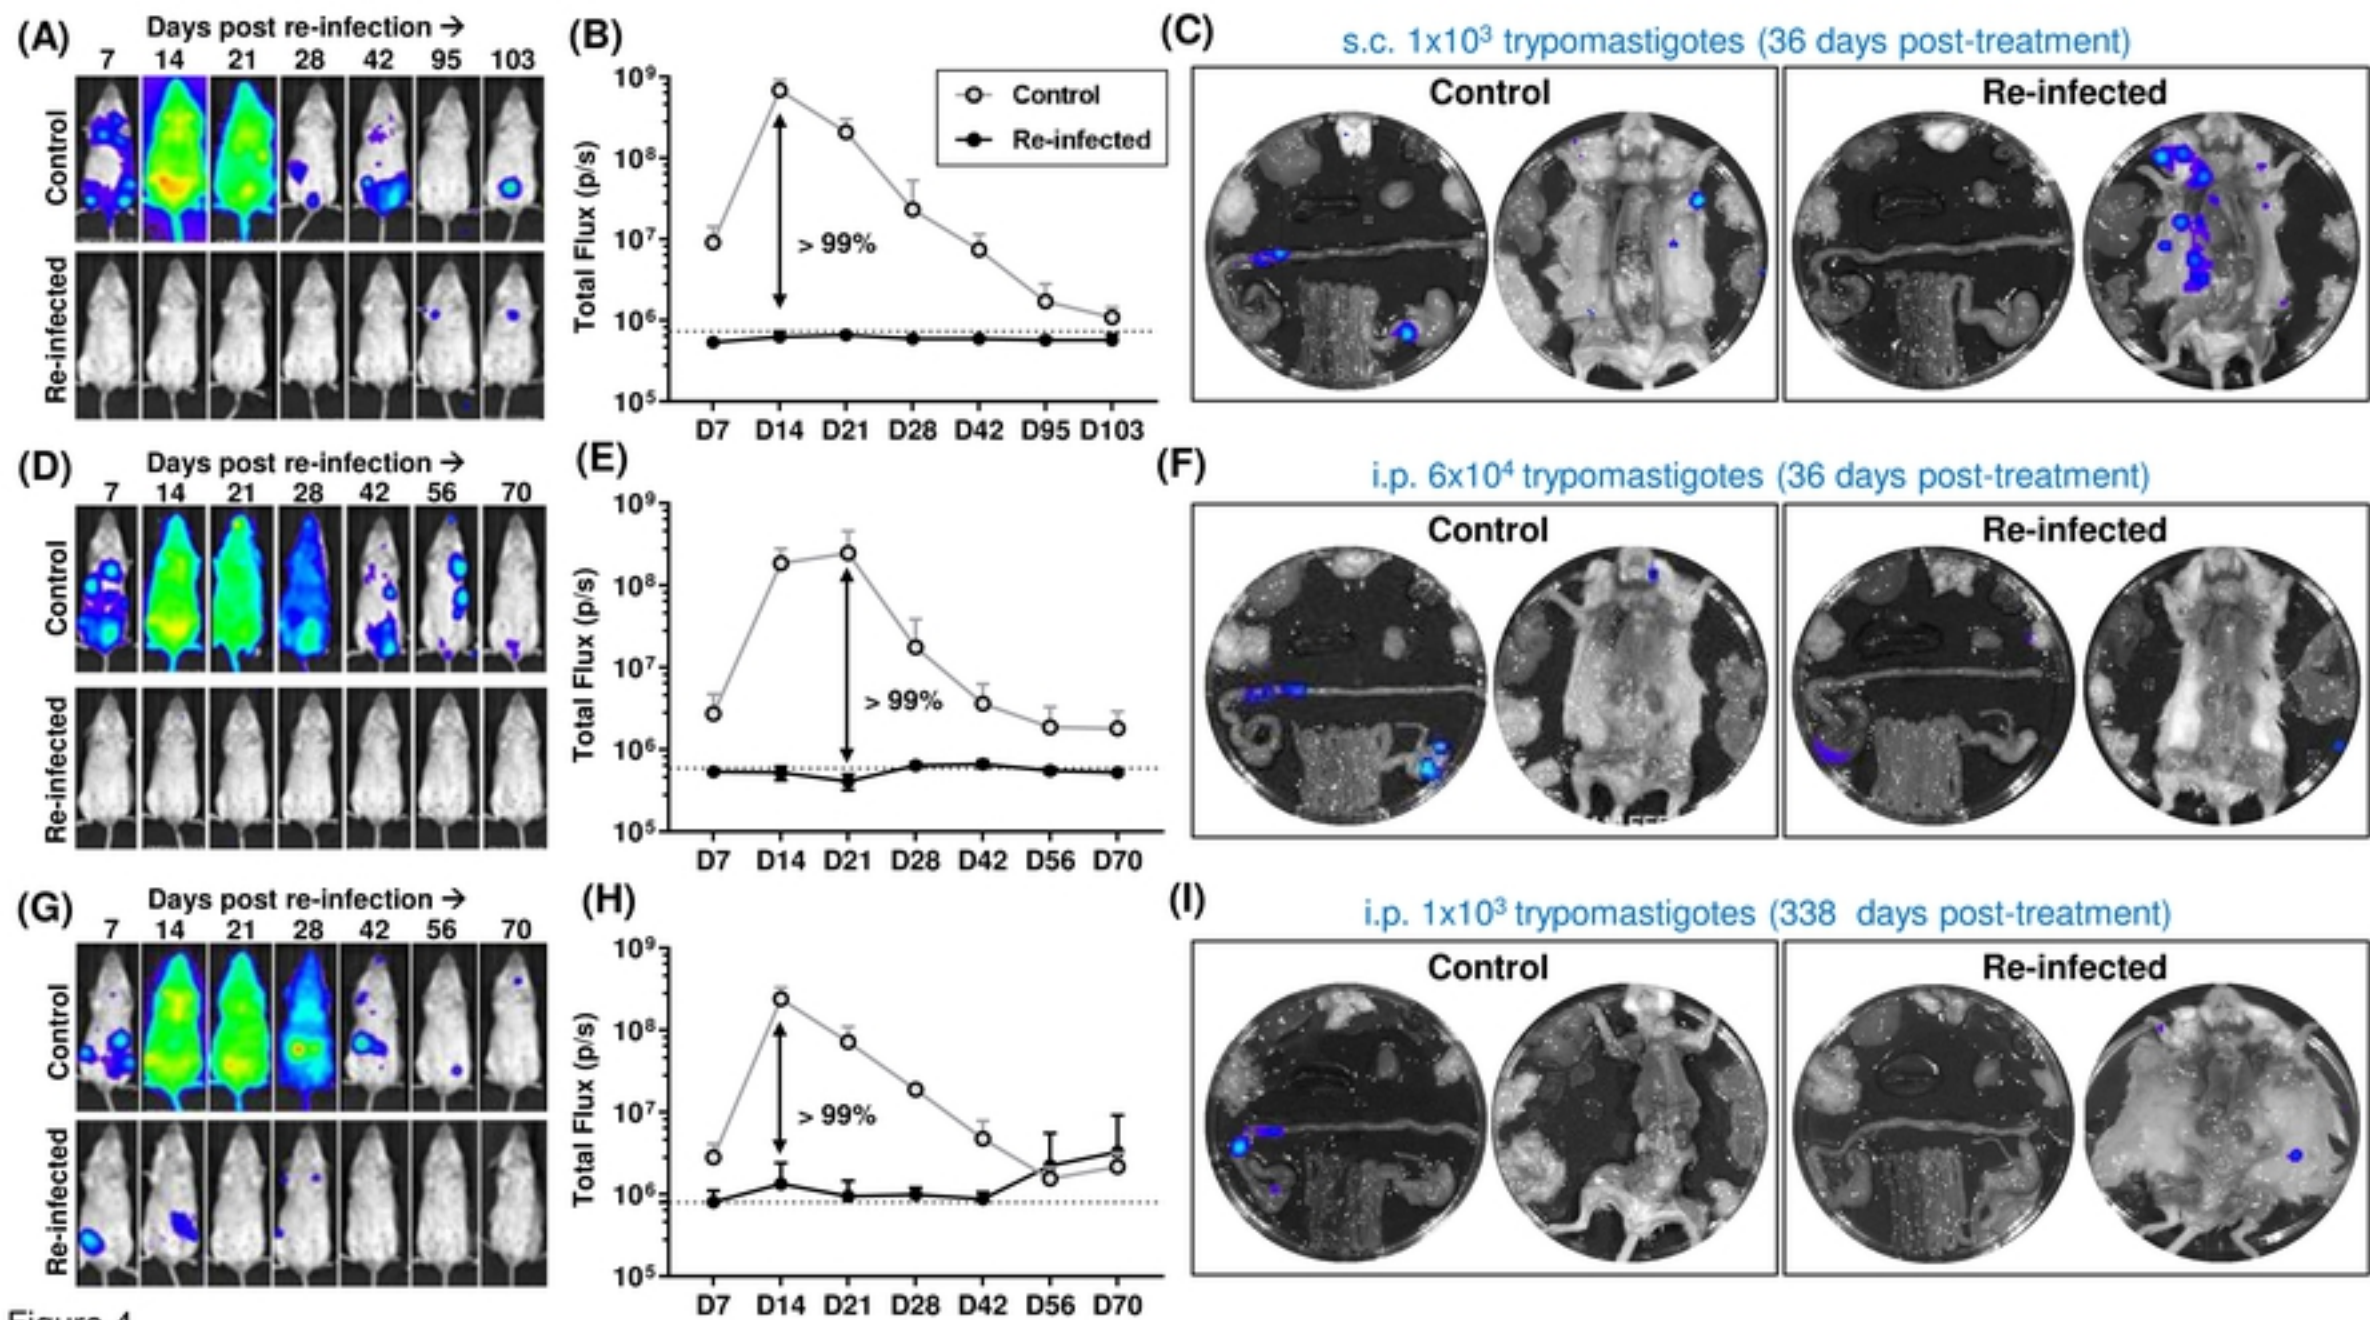

Figure 4

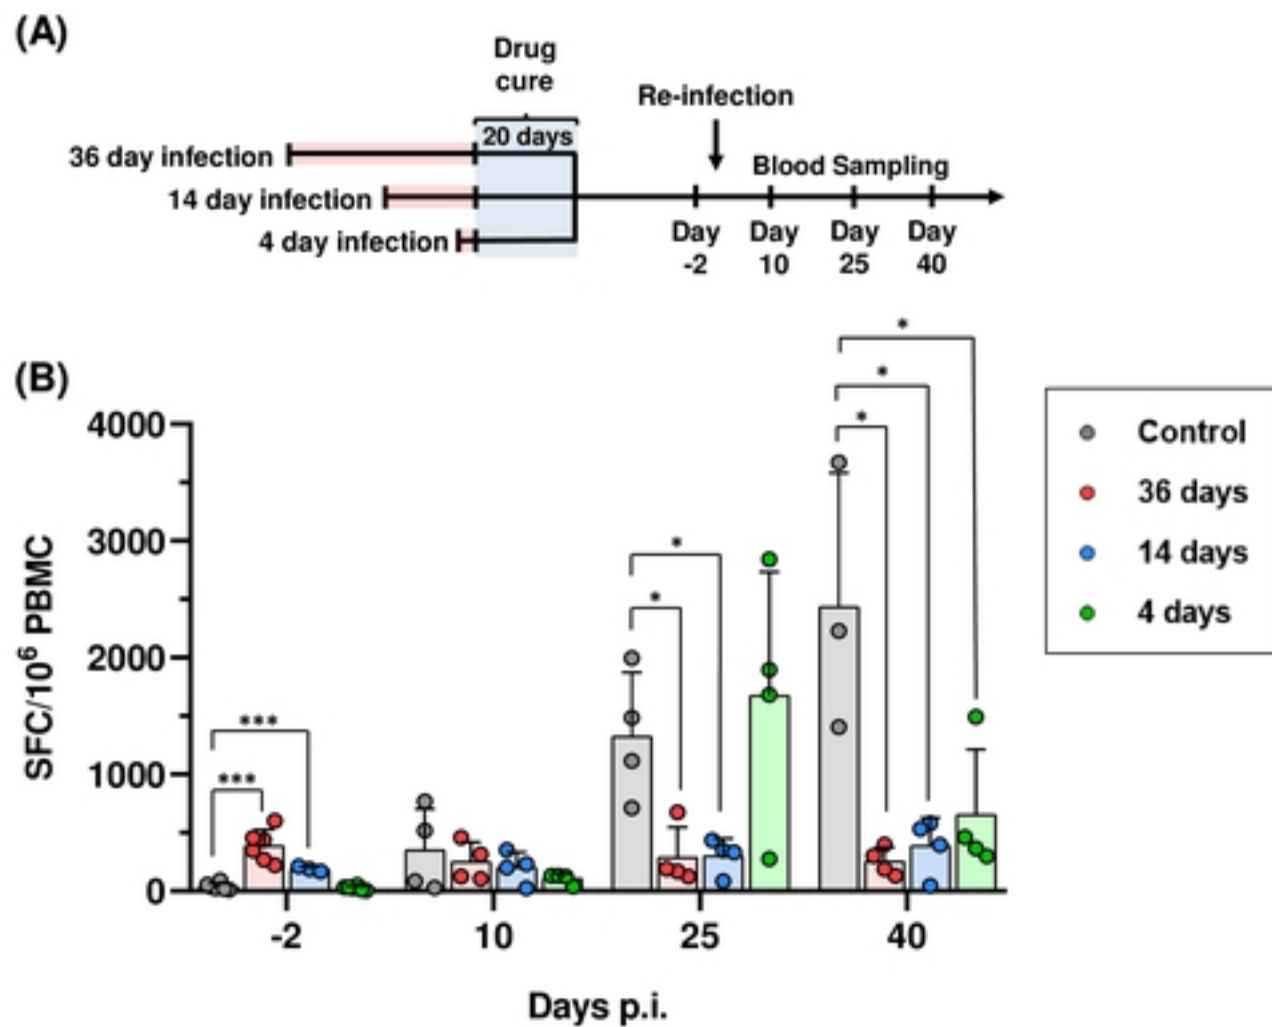

Figure 5

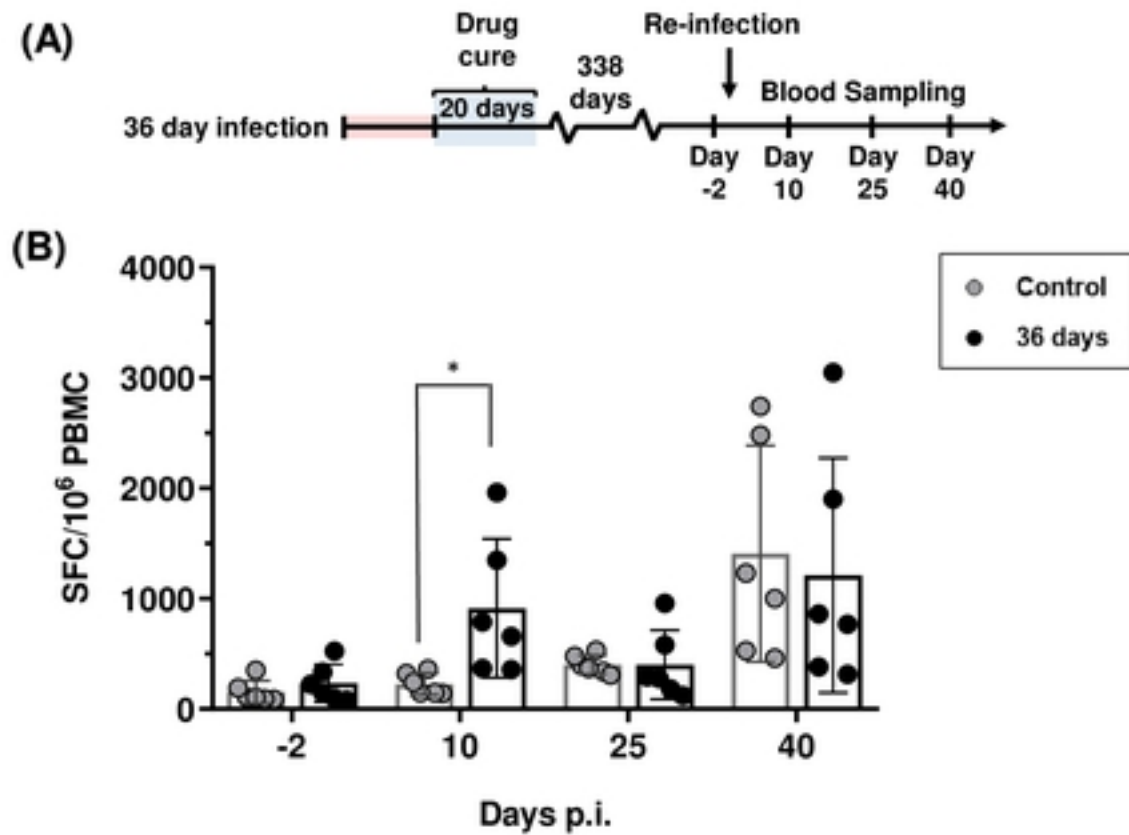

Figure 6

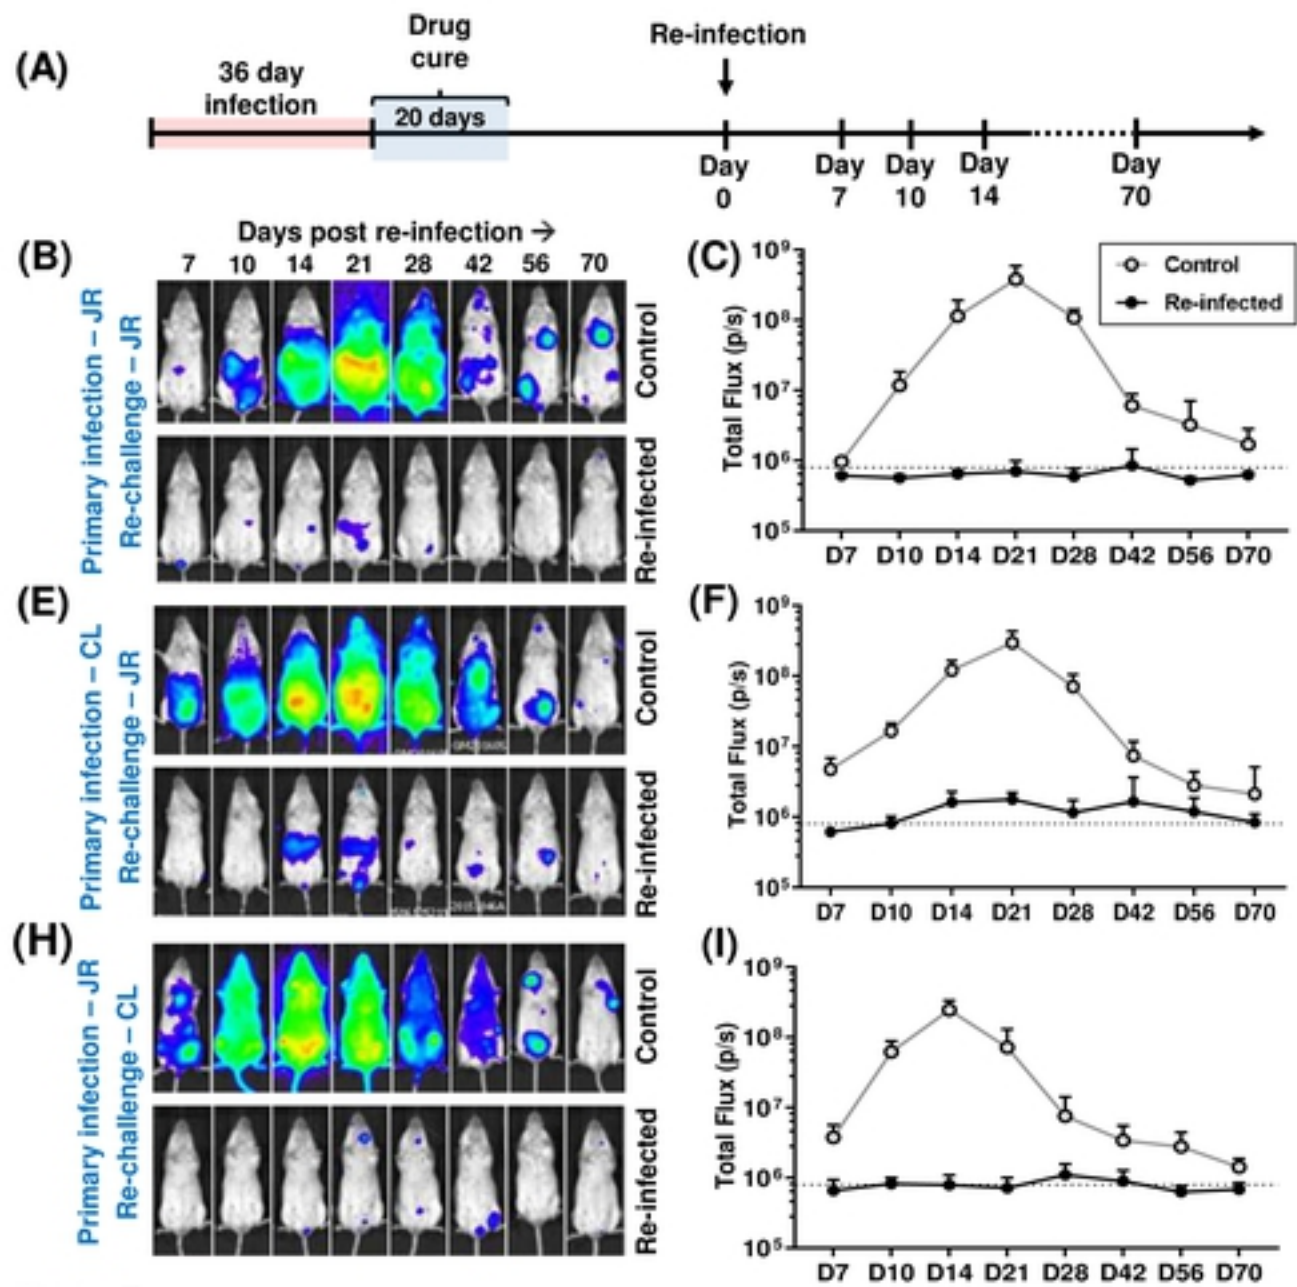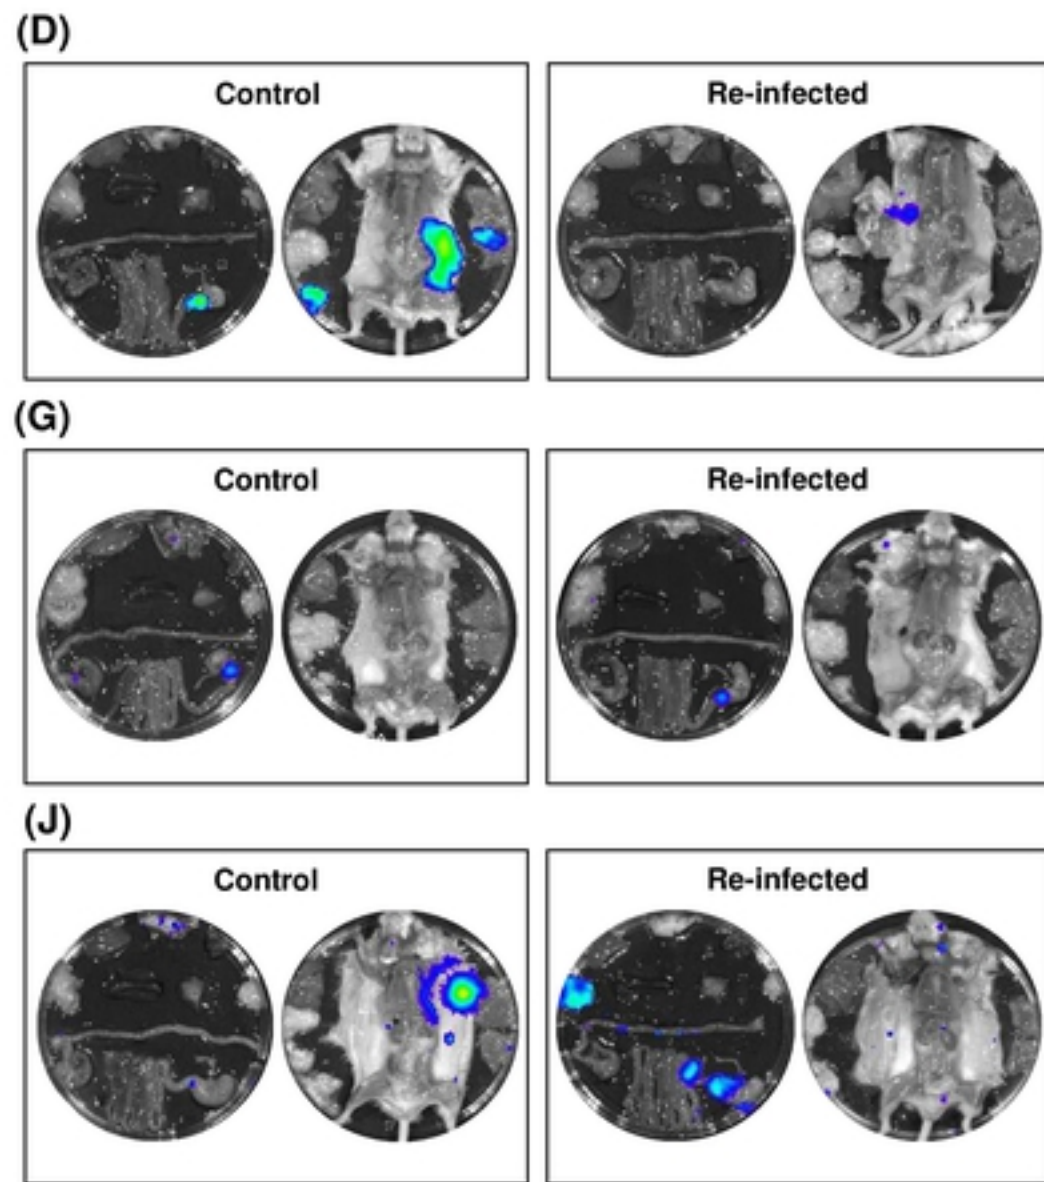

Figure 7
